# Supplementary material for: Association between Statin Use and Gastric Cancer: A Nested Case-Control Study Using a National Health Screening Cohort in Korea
Source: MDPI journal article supplement (doi:10.3390/ph14121283), 2021-12-08
Supplement: s1 [file s1]

**Supplementary Table S1** Crude and overlap propensity score weighted odd ratios of dates of any statin prescription for gastric cancer.

| Characteristics                | N of<br>gastric cancer | N of<br>Control       | Odd ratios for gastric cancer (95% confidence interval) |                 |                          |                 |
|--------------------------------|------------------------|-----------------------|---------------------------------------------------------|-----------------|--------------------------|-----------------|
|                                | (exposure/total, %)    | (exposure/total, %)   | Crude                                                   | <i>P</i> -value | Overlap weighted model † | <i>P</i> -value |
| Age < 65 years old (n= 20,780) |                        |                       |                                                         |                 |                          |                 |
| < 180 days                     | 3,759/4,156 (90.4%)    | 14,964/16,624 (90.0%) | 1                                                       |                 | 1                        |                 |
| 180 to 545 days                | 208/4,156 (5.0%)       | 872/16,624 (5.2%)     | 0.95 (0.81-1.11)                                        | 0.514           | 1.00 (0.88-1.14)         | 0.984           |
| > 545 days                     | 189/4,156 (4.5%)       | 788/16,624 (4.7%)     | 0.95 (0.81-1.12)                                        | 0.577           | 0.97 (0.85-1.11)         | 0.644           |
| Age ≥ 65 years old (n= 23,210) |                        |                       |                                                         |                 |                          |                 |
| < 180 days                     | 3,961/4,642 (85.3%)    | 15,576/18,568 (83.9%) | 1                                                       |                 | 1                        |                 |
| 180 to 545 days                | 292/4,642 (6.3%)       | 1,353/18,568 (7.3%)   | 0.85 (0.74-0.97)                                        | 0.014*          | 0.81 (0.73-0.91)         | <0.001*         |
| > 545 days                     | 389/4,642 (8.4%)       | 1,639/18,568 (8.8%)   | 0.93 (0.83-1.05)                                        | 0.243           | 0.94 (0.85-1.03)         | 0.186           |
| Male (n= 32,355)               |                        |                       |                                                         |                 |                          |                 |
| < 180 days                     | 5,740/6,471 (88.7%)    | 22,770/25,884 (88.0%) | 1                                                       |                 | 1                        |                 |
| 180 to 545 days                | 335/6,471 (5.2%)       | 1,440/25,884 (5.6%)   | 0.92 (0.82-1.04)                                        | 0.199           | 0.89 (0.80-0.98)         | 0.021*          |
| > 545 days                     | 396/6,471 (6.1%)       | 1,674/25,884 (6.5%)   | 0.94 (0.84-1.05)                                        | 0.271           | 0.93 (0.85-1.02)         | 0.127           |
| Female (n= 11,635)             |                        |                       |                                                         |                 |                          |                 |
| < 180 days                     | 1,980/2,327 (85.1%)    | 7,770/9,308 (83.5%)   | 1                                                       |                 | 1                        |                 |
| 180 to 545 days                | 165/2,327 (7.1%)       | 785/9,308 (8.4%)      | 0.82 (0.69-0.98)                                        | 0.031*          | 0.87 (0.75-1.00)         | 0.051           |
| > 545 days                     | 182/2,327 (7.8%)       | 753/9,308 (8.1%)      | 0.95 (0.80-1.12)                                        | 0.540           | 1.02 (0.88-1.18)         | 0.801           |
| Low income groups (n= 19,375)  |                        |                       |                                                         |                 |                          |                 |
| < 180 days                     | 3,394/3,875 (87.6%)    | 13,604/15,500 (87.8%) | 1                                                       |                 | 1                        |                 |
| 180 to 545 days                | 239/3,875 (6.2%)       | 947/15,500 (6.1%)     | 1.01 (0.87-1.17)                                        | 0.878           | 1.01 (0.89-1.14)         | 0.918           |
| > 545 days                     | 242/3,875 (6.2%)       | 949/15,500 (6.1%)     | 1.02 (0.88-1.18)                                        | 0.768           | 1.10 (0.97-1.24)         | 0.137           |
| High income groups (n= 24,615) |                        |                       |                                                         |                 |                          |                 |
| < 180 days                     | 4,326/4,923 (87.9%)    | 16,936/19,692 (86.0%) | 1                                                       |                 | 1                        |                 |
| 180 to 545 days                | 261/4,923 (5.3%)       | 1,278/19,692 (6.5%)   | 0.80 (0.70-0.92)                                        | 0.001*          | 0.79 (0.71-0.88)         | <0.001*         |
| > 545 days                     | 336/4,923 (6.8%)       | 1,478/19,692 (7.5%)   | 0.89 (0.79-1.01)                                        | 0.064           | 0.87 (0.79-0.97)         | 0.010*          |
| Urban residents (n= 18,070)    |                        |                       |                                                         |                 |                          |                 |
| < 180 days                     | 3,132/3,614 (86.7%)    | 12,382/14,456 (85.7%) | 1                                                       |                 | 1                        |                 |
| 180 to 545 days                | 224/3,614 (6.2%)       | 975/14,456 (6.7%)     | 0.91 (0.78-1.06)                                        | 0.210           | 0.91 (0.81-1.03)         | 0.140           |
| > 545 days                     | 258/3,614 (7.1%)       | 1,099/14,456 (7.6%)   | 0.93 (0.81-1.07)                                        | 0.300           | 0.95 (0.85-1.07)         | 0.436           |
| Rural residents (n= 25,920)    |                        |                       |                                                         |                 |                          |                 |
| < 180 days                     | 4,588/5,184 (88.5%)    | 18,158/20,736 (87.6%) | 1                                                       |                 | 1                        |                 |
| 180 to 545 days                | 276/5,184 (5.3%)       | 1,250/20,736 (6.0%)   | 0.87 (0.76-1.00)                                        | 0.049*          | 0.86 (0.77-0.96)         | 0.006*          |
| > 545 days                     | 320/5,184 (6.2%)       | 1,328/20,736 (6.4%)   | 0.95 (0.84-1.08)                                        | 0.462           | 0.96 (0.86-1.07)         | 0.465           |
| Underweight (n= 1,306)         |                        |                       |                                                         |                 |                          |                 |
| < 180 days                     | 320/333 (96.1%)        | 909/973 (93.4%)       | 1                                                       |                 | 1                        |                 |
| 180 to 545 days                | 6/333 (1.8%)           | 37/973 (3.8%)         | 0.46 (0.19-1.10)                                        | 0.082           | 0.63 (0.31-1.28)         | 0.200           |

|                                                |                     |                       |                  |        |                  |        |
|------------------------------------------------|---------------------|-----------------------|------------------|--------|------------------|--------|
| > 545 days                                     | 7/333 (2.1%)        | 27/973 (2.8%)         | 0.74 (0.32-1.71) | 0.476  | 0.93 (0.44-2.00) | 0.861  |
| Normal weight (n= 15,700)                      |                     |                       |                  |        |                  |        |
| < 180 days                                     | 2,957/3,240 (91.3%) | 11,262/12,460 (90.4%) | 1                |        | 1                |        |
| 180 to 545 days                                | 139/3,240 (4.3%)    | 612/12,460 (4.9%)     | 0.87 (0.72-1.04) | 0.132  | 0.87 (0.75-1.02) | 0.086  |
| > 545 days                                     | 144/3,240 (4.4%)    | 586/12,460 (4.7%)     | 0.94 (0.78-1.13) | 0.487  | 0.91 (0.78-1.07) | 0.268  |
| Overweight (n= 11,986)                         |                     |                       |                  |        |                  |        |
| < 180 days                                     | 1,970/2,285 (86.2%) | 8,413/9,701 (86.7%)   | 1                |        | 1                |        |
| 180 to 545 days                                | 150/2,285 (6.6%)    | 600/9,701 (6.2%)      | 1.07 (0.89-1.29) | 0.489  | 1.00 (0.86-1.16) | 0.982  |
| > 545 days                                     | 165/2,285 (7.2%)    | 688/9,701 (7.1%)      | 1.02 (0.86-1.22) | 0.791  | 1.02 (0.88-1.18) | 0.821  |
| Obese (n= 14,998)                              |                     |                       |                  |        |                  |        |
| < 180 days                                     | 2,473/2,940 (84.1%) | 9,956/12,058 (82.6%)  | 1                |        | 1                |        |
| 180 to 545 days                                | 205/2,940 (7.0%)    | 976/12,058 (8.1%)     | 0.85 (0.72-0.99) | 0.036* | 0.82 (0.72-0.93) | 0.002* |
| > 545 days                                     | 262/2,940 (8.9%)    | 1,126/12,058 (9.3%)   | 0.94 (0.81-1.08) | 0.365  | 0.94 (0.84-1.06) | 0.342  |
| Non-smoker (n= 26,498)                         |                     |                       |                  |        |                  |        |
| < 180 days                                     | 4,367/4,997 (87.4%) | 18,615/21,501 (86.6%) | 1                |        | 1                |        |
| 180 to 545 days                                | 286/4,997 (5.7%)    | 1,421/21,501 (6.6%)   | 0.86 (0.75-0.98) | 0.022* | 0.86 (0.78-0.96) | 0.005* |
| > 545 days                                     | 344/4,997 (6.9%)    | 1,465/21,501 (6.8%)   | 1.00 (0.89-1.13) | 0.988  | 1.05 (0.95-1.16) | 0.343  |
| Past and current smoker (n= 17,492)            |                     |                       |                  |        |                  |        |
| < 180 days                                     | 3,353/3,801 (88.2%) | 11,925/13,691 (87.1%) | 1                |        | 1                |        |
| 180 to 545 days                                | 214/3,801 (5.6%)    | 804/13,691 (5.9%)     | 0.95 (0.81-1.11) | 0.490  | 0.91 (0.79-1.04) | 0.148  |
| > 545 days                                     | 234/3,801 (6.2%)    | 962/13,691 (7.0%)     | 0.87 (0.75-1.00) | 0.055  | 0.84 (0.73-0.95) | 0.006* |
| Alcohol consumption <1 time a week (n= 26,085) |                     |                       |                  |        |                  |        |
| < 180 days                                     | 4,310/4,893 (88.1%) | 18,354/21,192 (86.6%) | 1                |        | 1                |        |
| 180 to 545 days                                | 280/4,893 (5.7%)    | 1,347/21,192 (6.4%)   | 0.89 (0.78-1.01) | 0.072  | 0.90 (0.81-1.01) | 0.062  |
| > 545 days                                     | 303/4,893 (6.2%)    | 1,491/21,192 (7.0%)   | 0.87 (0.76-0.98) | 0.027* | 0.92 (0.83-1.02) | 0.100  |
| Alcohol consumption ≥1 time a week (n= 17,905) |                     |                       |                  |        |                  |        |
| < 180 days                                     | 3,410/3,905 (87.3%) | 12,186/14,000 (87.0%) | 1                |        | 1                |        |
| 180 to 545 days                                | 220/3,905 (5.6%)    | 878/14,000 (6.3%)     | 0.90 (0.77-1.04) | 0.156  | 0.84 (0.74-0.96) | 0.008* |
| > 545 days                                     | 275/3,905 (7.0%)    | 936/14,000 (6.7%)     | 1.05 (0.91-1.21) | 0.494  | 1.00 (0.89-1.14) | 0.964  |
| SBP < 140 mmHg and DBP < 90 mmHg (n= 31,460)   |                     |                       |                  |        |                  |        |
| < 180 days                                     | 5,563/6,300 (88.3%) | 21,902/25,160 (87.1%) | 1                |        | 1                |        |
| 180 to 545 days                                | 325/6,300 (5.2%)    | 1,514/25,160 (6.0%)   | 0.85 (0.75-0.96) | 0.008* | 0.86 (0.77-0.95) | 0.002* |
| > 545 days                                     | 412/6,300 (6.5%)    | 1,744/25,160 (6.9%)   | 0.93 (0.83-1.04) | 0.202  | 0.93 (0.85-1.03) | 0.160  |
| SBP ≥ 140 mmHg or DBP ≥ 90 mmHg (n= 12,530)    |                     |                       |                  |        |                  |        |
| < 180 days                                     | 2,157/2,498 (86.3%) | 8,638/10,032 (86.1%)  | 1                |        | 1                |        |
| 180 to 545 days                                | 175/2,498 (7.0%)    | 711/10,032 (7.1%)     | 0.99 (0.83-1.17) | 0.870  | 0.94 (0.81-1.08) | 0.377  |
| > 545 days                                     | 166/2,498 (6.6%)    | 683/10,032 (6.8%)     | 0.97 (0.82-1.16) | 0.765  | 1.02 (0.88-1.18) | 0.831  |
| Fasting blood glucose < 100 mg/dL (n= 25,677)  |                     |                       |                  |        |                  |        |
| < 180 days                                     | 4,547/5,024 (90.5%) | 18,532/20,653 (89.7%) | 1                |        | 1                |        |
| 180 to 545 days                                | 236/5,024 (4.7%)    | 1,087/20,653 (5.3%)   | 0.88 (0.77-1.02) | 0.097  | 0.94 (0.83-1.05) | 0.278  |

|                                                    |                     |                       |                  |         |                  |         |
|----------------------------------------------------|---------------------|-----------------------|------------------|---------|------------------|---------|
| > 545 days                                         | 241/5,024 (4.8%)    | 1,034/20,653 (5.0%)   | 0.95 (0.82-1.10) | 0.484   | 0.97 (0.86-1.09) | 0.588   |
| Fasting blood glucose $\geq$ 100 mg/dL (n= 18,313) |                     |                       |                  |         |                  |         |
| < 180 days                                         | 3,173/3,774 (84.1%) | 12,008/14,539 (82.6%) | 1                |         | 1                |         |
| 180 to 545 days                                    | 264/3,774 (7.0%)    | 1,138/14,539 (7.8%)   | 0.88 (0.76-1.01) | 0.067   | 0.84 (0.75-0.94) | 0.003*  |
| > 545 days                                         | 337/3,774 (8.9%)    | 1,393/14,539 (9.6%)   | 0.92 (0.81-1.04) | 0.167   | 0.94 (0.85-1.05) | 0.278   |
| Total cholesterol < 200 mg/dL (n= 25,042)          |                     |                       |                  |         |                  |         |
| < 180 days                                         | 4,512/5,231 (86.3%) | 16,995/19,811 (85.8%) | 1                |         | 1                |         |
| 180 to 545 days                                    | 278/5,231 (5.3%)    | 1,066/19,811 (5.4%)   | 0.98 (0.86-1.13) | 0.797   | 0.92 (0.82-1.03) | 0.139   |
| > 545 days                                         | 441/5,231 (8.4%)    | 1,750/19,811 (8.8%)   | 0.95 (0.85-1.06) | 0.351   | 0.96 (0.87-1.06) | 0.459   |
| Total cholesterol $\geq$ 200 mg/dL (n= 18,948)     |                     |                       |                  |         |                  |         |
| < 180 days                                         | 3,208/3,567 (89.9%) | 13,545/15,381 (88.1%) | 1                |         | 1                |         |
| 180 to 545 days                                    | 222/3,567 (6.2%)    | 1,159/15,381 (7.5%)   | 0.81 (0.70-0.94) | 0.005*  | 0.83 (0.74-0.94) | 0.002*  |
| > 545 days                                         | 137/3,567 (3.8%)    | 677/15,381 (4.4%)     | 0.85 (0.71-1.03) | 0.100   | 0.86 (0.74-1.00) | 0.050   |
| CCI scores = 0 (n= 26,666)                         |                     |                       |                  |         |                  |         |
| < 180 days                                         | 2,880/3,212 (89.7%) | 20,905/23,454 (89.1%) | 1                |         | 1                |         |
| 180 to 545 days                                    | 166/3,212 (5.2%)    | 1,275/23,454 (5.4%)   | 0.95 (0.80-1.12) | 0.506   | 0.96 (0.86-1.08) | 0.539   |
| > 545 days                                         | 166/3,212 (5.2%)    | 1,274/23,454 (5.4%)   | 0.95 (0.80-1.12) | 0.511   | 0.95 (0.84-1.07) | 0.380   |
| CCI scores = 1 (n= 7,848)                          |                     |                       |                  |         |                  |         |
| < 180 days                                         | 1,694/1,972 (85.9%) | 4,883/5,876 (83.1%)   | 1                |         | 1                |         |
| 180 to 545 days                                    | 111/1,972 (5.6%)    | 439/5,876 (7.5%)      | 0.73 (0.59-0.90) | 0.004*  | 0.79 (0.66-0.96) | 0.019*  |
| > 545 days                                         | 167/1,972 (8.5%)    | 554/5,876 (9.4%)      | 0.87 (0.72-1.04) | 0.130   | 1.01 (0.84-1.20) | 0.940   |
| CCI scores $\geq$ 2 (n= 9,476)                     |                     |                       |                  |         |                  |         |
| < 180 days                                         | 3,146/3,614 (87.1%) | 4,752/5,862 (81.1%)   | 1                |         | 1                |         |
| 180 to 545 days                                    | 223/3,614 (6.2%)    | 511/5,862 (8.7%)      | 0.66 (0.56-0.78) | <0.001* | 0.84 (0.71-0.98) | 0.030*  |
| > 545 days                                         | 245/3,614 (6.8%)    | 599/5,862 (10.2%)     | 0.62 (0.53-0.72) | <0.001* | 0.90 (0.77-1.05) | 0.181   |
| Non dyslipidemia history (n= 25,900)               |                     |                       |                  |         |                  |         |
| < 180 days                                         | 5,397/5,514 (97.9%) | 19,868/20,386 (97.5%) | 1                |         | 1                |         |
| 180 to 545 days                                    | 59/5,514 (1.1%)     | 276/20,386 (1.4%)     | 0.79 (0.59-1.04) | 0.097   | 0.65 (0.52-0.80) | <0.001* |
| > 545 days                                         | 58/5,514 (1.1%)     | 242/20,386 (1.2%)     | 0.88 (0.66-1.18) | 0.394   | 0.73 (0.59-0.92) | 0.007*  |
| Dyslipidemia history (n= 18,090)                   |                     |                       |                  |         |                  |         |
| < 180 days                                         | 2,323/3,284 (70.7%) | 10,672/14,806 (72.1%) | 1                |         | 1                |         |
| 180 to 545 days                                    | 441/3,284 (13.4%)   | 1,949/14,806 (13.2%)  | 1.04 (0.93-1.16) | 0.500   | 0.93 (0.86-1.02) | 0.124   |
| > 545 days                                         | 520/3,284 (15.8%)   | 2,185/14,806 (14.8%)  | 1.09 (0.98-1.22) | 0.098   | 0.96 (0.89-1.05) | 0.410   |

Abbreviations: CCI, Charlson Comorbidity Index; SBP, Systolic blood pressure; DBP, Diastolic blood pressure

\* Significance at  $P < 0.05$

† Adjusted for age, sex, income, region of residence, SBP, DBP, fasting blood glucose, total cholesterol, obesity, smoking, alcohol consumption, dyslipidemia history, and CCI scores.

**Supplementary Table S2** Crude and overlap propensity score weighted odd ratios of dates of hydrophilic statin prescription for gastric cancer.

| Characteristics                | N of<br>gastric cancer | N of<br>Control       | Odd ratios for gastric cancer (95% confidence interval) |                 |                          |                 |
|--------------------------------|------------------------|-----------------------|---------------------------------------------------------|-----------------|--------------------------|-----------------|
|                                | (exposure/total, %)    | (exposure/total, %)   | Crude                                                   | <i>P</i> -value | Overlap weighted model † | <i>P</i> -value |
| Age < 65 years old (n= 20,780) |                        |                       |                                                         |                 |                          |                 |
| < 180 days                     | 4,091/4,156 (98.4%)    | 16,364/16,624 (98.4%) | 1                                                       |                 | 1                        |                 |
| 180 to 545 days                | 37/4,156 (0.9%)        | 152/16,624 (0.9%)     | 0.97 (0.68-1.40)                                        | 0.886           | 0.93 (0.70-1.23)         | 0.609           |
| > 545 days                     | 28/4,156 (0.7%)        | 108/16,624 (0.6%)     | 1.04 (0.68-1.57)                                        | 0.863           | 0.94 (0.68-1.31)         | 0.724           |
| Age ≥ 65 years old (n= 23,210) |                        |                       |                                                         |                 |                          |                 |
| < 180 days                     | 4,511/4,642 (97.2%)    | 18,015/18,568 (97.0%) | 1                                                       |                 | 1                        |                 |
| 180 to 545 days                | 60/4,642 (1.3%)        | 304/18,568 (1.6%)     | 0.79 (0.60-1.04)                                        | 0.094           | 0.71 (0.57-0.88)         | 0.002*          |
| > 545 days                     | 71/4,642 (1.5%)        | 249/18,568 (1.3%)     | 1.14 (0.87-1.49)                                        | 0.338           | 1.06 (0.86-1.32)         | 0.592           |
| Male (n= 32,355)               |                        |                       |                                                         |                 |                          |                 |
| < 180 days                     | 6,332/6,471 (97.9%)    | 25,306/25,884 (97.8%) | 1                                                       |                 | 1                        |                 |
| 180 to 545 days                | 65/6,471 (1.0%)        | 312/25,884 (1.2%)     | 0.83 (0.64-1.09)                                        | 0.182           | 0.79 (0.65-0.97)         | 0.027*          |
| > 545 days                     | 74/6,471 (1.1%)        | 266/25,884 (1.0%)     | 1.11 (0.86-1.44)                                        | 0.423           | 1.04 (0.84-1.27)         | 0.737           |
| Female (n= 11,635)             |                        |                       |                                                         |                 |                          |                 |
| < 180 days                     | 2,270/2,327 (97.6%)    | 9,073/9,308 (97.5%)   | 1                                                       |                 | 1                        |                 |
| 180 to 545 days                | 32/2,327 (1.4%)        | 144/9,308 (1.5%)      | 0.89 (0.60-1.31)                                        | 0.547           | 0.76 (0.56-1.02)         | 0.071           |
| > 545 days                     | 25/2,327 (1.1%)        | 91/9,308 (1.0%)       | 1.10 (0.70-1.71)                                        | 0.680           | 1.01 (0.70-1.45)         | 0.974           |
| Low income groups (n= 19,375)  |                        |                       |                                                         |                 |                          |                 |
| < 180 days                     | 3,792/3,875 (97.9%)    | 15,169/15,500 (97.9%) | 1                                                       |                 | 1                        |                 |
| 180 to 545 days                | 41/3,875 (1.1%)        | 196/15,500 (1.3%)     | 0.84 (0.60-1.17)                                        | 0.302           | 0.75 (0.57-0.97)         | 0.030*          |
| > 545 days                     | 42/3,875 (1.1%)        | 135/15,500 (0.9%)     | 1.24 (0.88-1.76)                                        | 0.218           | 1.26 (0.95-1.67)         | 0.108           |
| High income groups (n= 24,615) |                        |                       |                                                         |                 |                          |                 |
| < 180 days                     | 4,810/4,923 (97.7%)    | 19,210/19,692 (97.6%) | 1                                                       |                 | 1                        |                 |
| 180 to 545 days                | 56/4,923 (1.1%)        | 260/19,692 (1.3%)     | 0.86 (0.64-1.15)                                        | 0.310           | 0.80 (0.64-1.00)         | 0.052           |
| > 545 days                     | 57/4,923 (1.2%)        | 222/19,692 (1.1%)     | 1.03 (0.77-1.37)                                        | 0.867           | 0.90 (0.72-1.14)         | 0.396           |
| Urban residents (n= 18,070)    |                        |                       |                                                         |                 |                          |                 |
| < 180 days                     | 3,513/3,614 (97.2%)    | 14,117/14,456 (97.7%) | 1                                                       |                 | 1                        |                 |
| 180 to 545 days                | 57/3,614 (1.6%)        | 185/14,456 (1.3%)     | 1.24 (0.92-1.67)                                        | 0.162           | 1.18 (0.92-1.51)         | 0.182           |
| > 545 days                     | 44/3,614 (1.2%)        | 154/14,456 (1.1%)     | 1.15 (0.82-1.61)                                        | 0.422           | 1.08 (0.83-1.42)         | 0.563           |
| Rural residents (n= 25,920)    |                        |                       |                                                         |                 |                          |                 |
| < 180 days                     | 5,089/5,184 (98.2%)    | 20,262/20,736 (97.7%) | 1                                                       |                 | 1                        |                 |
| 180 to 545 days                | 40/5,184 (0.8%)        | 271/20,736 (1.3%)     | 0.59 (0.42-0.82)                                        | 0.002*          | 0.52 (0.41-0.67)         | <0.001*         |
| > 545 days                     | 55/5,184 (1.1%)        | 203/20,736 (1.0%)     | 1.08 (0.80-1.46)                                        | 0.620           | 0.99 (0.78-1.26)         | 0.958           |
| Underweight (n= 1,306)         |                        |                       |                                                         |                 |                          |                 |
| < 180 days                     | 331/333 (99.4%)        | 960/973 (98.7%)       | 1                                                       |                 | 1                        |                 |
| 180 to 545 days                | 1/333 (0.3%)           | 9/973 (0.9%)          | 0.32 (0.04-2.55)                                        | 0.284           | 0.62 (0.13-3.06)         | 0.558           |

|                                                |                     |                       |                  |       |                  |        |
|------------------------------------------------|---------------------|-----------------------|------------------|-------|------------------|--------|
| > 545 days                                     | 1/333 (0.3%)        | 4/973 (0.4%)          | 0.73 (0.08-6.51) | 0.774 | 0.82 (0.14-4.87) | 0.828  |
| Normal weight (n= 15,700)                      |                     |                       |                  |       |                  |        |
| < 180 days                                     | 3,186/3,240 (98.3%) | 12,239/12,460 (98.2%) | 1                |       | 1                |        |
| 180 to 545 days                                | 25/3,240 (0.8%)     | 136/12,460 (1.1%)     | 0.71 (0.46-1.08) | 0.112 | 0.68 (0.49-0.94) | 0.019* |
| > 545 days                                     | 29/3,240 (0.9%)     | 85/12,460 (0.7%)      | 1.31 (0.86-2.00) | 0.210 | 1.13 (0.80-1.59) | 0.477  |
| Overweight (n= 11,986)                         |                     |                       |                  |       |                  |        |
| < 180 days                                     | 2,231/2,285 (97.6%) | 9,471/9,701 (97.6%)   | 1                |       | 1                |        |
| 180 to 545 days                                | 29/2,285 (1.3%)     | 111/9,701 (1.1%)      | 1.11 (0.74-1.67) | 0.622 | 0.92 (0.67-1.25) | 0.583  |
| > 545 days                                     | 25/2,285 (1.1%)     | 119/9,701 (1.2%)      | 0.89 (0.58-1.38) | 0.605 | 0.86 (0.62-1.20) | 0.370  |
| Obese (n= 14,998)                              |                     |                       |                  |       |                  |        |
| < 180 days                                     | 2,854/2,940 (97.1%) | 11,709/12,058 (97.1%) | 1                |       | 1                |        |
| 180 to 545 days                                | 42/2,940 (1.4%)     | 200/12,058 (1.7%)     | 0.86 (0.62-1.20) | 0.384 | 0.77 (0.59-1.00) | 0.050* |
| > 545 days                                     | 44/2,940 (1.5%)     | 149/12,058 (1.2%)     | 1.21 (0.86-1.70) | 0.267 | 1.09 (0.83-1.43) | 0.531  |
| Non-smoker (n= 26,498)                         |                     |                       |                  |       |                  |        |
| < 180 days                                     | 4,888/4,997 (97.8%) | 21,023/21,501 (97.8%) | 1                |       | 1                |        |
| 180 to 545 days                                | 56/4,997 (1.1%)     | 277/21,501 (1.3%)     | 0.87 (0.65-1.16) | 0.343 | 0.77 (0.62-0.95) | 0.017* |
| > 545 days                                     | 53/4,997 (1.1%)     | 201/21,501 (0.9%)     | 1.13 (0.84-1.54) | 0.418 | 1.07 (0.84-1.36) | 0.575  |
| Past and current smoker (n= 17,492)            |                     |                       |                  |       |                  |        |
| < 180 days                                     | 3,714/3,801 (97.7%) | 13,356/13,691 (97.6%) | 1                |       | 1                |        |
| 180 to 545 days                                | 41/3,801 (1.1%)     | 179/13,691 (1.3%)     | 0.82 (0.59-1.16) | 0.265 | 0.79 (0.60-1.03) | 0.083  |
| > 545 days                                     | 46/3,801 (1.2%)     | 156/13,691 (1.1%)     | 1.06 (0.76-1.48) | 0.728 | 0.98 (0.75-1.28) | 0.878  |
| Alcohol consumption <1 time a week (n= 26,085) |                     |                       |                  |       |                  |        |
| < 180 days                                     | 4,792/4,893 (97.9%) | 20,729/21,192 (97.8%) | 1                |       | 1                |        |
| 180 to 545 days                                | 50/4,893 (1.0%)     | 253/21,192 (1.2%)     | 0.85 (0.63-1.16) | 0.314 | 0.81 (0.65-1.02) | 0.071  |
| > 545 days                                     | 51/4,893 (1.0%)     | 210/21,192 (1.0%)     | 1.05 (0.77-1.43) | 0.753 | 0.98 (0.77-1.24) | 0.835  |
| Alcohol consumption ≥1 time a week (n= 17,905) |                     |                       |                  |       |                  |        |
| < 180 days                                     | 3,810/3,905 (97.6%) | 13,650/14,000 (97.5%) | 1                |       | 1                |        |
| 180 to 545 days                                | 47/3,905 (1.2%)     | 203/14,000 (1.5%)     | 0.83 (0.60-1.14) | 0.251 | 0.73 (0.57-0.95) | 0.017* |
| > 545 days                                     | 48/3,905 (1.2%)     | 147/14,000 (1.1%)     | 1.17 (0.84-1.62) | 0.348 | 1.09 (0.83-1.44) | 0.528  |
| SBP < 140 mmHg and DBP < 90 mmHg (n= 31,460)   |                     |                       |                  |       |                  |        |
| < 180 days                                     | 6,160/6,300 (97.8%) | 24,584/25,160 (97.7%) | 1                |       | 1                |        |
| 180 to 545 days                                | 67/6,300 (1.1%)     | 312/25,160 (1.2%)     | 0.86 (0.66-1.12) | 0.255 | 0.79 (0.64-0.97) | 0.024* |
| > 545 days                                     | 73/6,300 (1.2%)     | 264/25,160 (1.0%)     | 1.10 (0.85-1.43) | 0.459 | 1.05 (0.85-1.30) | 0.646  |
| SBP ≥ 140 mmHg or DBP ≥ 90 mmHg (n= 12,530)    |                     |                       |                  |       |                  |        |
| < 180 days                                     | 2,442/2,498 (97.8%) | 9,795/10,032 (97.6%)  | 1                |       | 1                |        |
| 180 to 545 days                                | 30/2,498 (1.2%)     | 144/10,032 (1.4%)     | 0.84 (0.56-1.24) | 0.374 | 0.76 (0.56-1.04) | 0.083  |
| > 545 days                                     | 26/2,498 (1.0%)     | 93/10,032 (0.9%)      | 1.12 (0.72-1.74) | 0.607 | 1.00 (0.72-1.41) | 0.984  |
| Fasting blood glucose < 100 mg/dL (n= 25,677)  |                     |                       |                  |       |                  |        |
| < 180 days                                     | 4,940/5,024 (98.3%) | 20,299/20,653 (98.3%) | 1                |       | 1                |        |

|                                                    |                     |                       |                  |        |                  |        |
|----------------------------------------------------|---------------------|-----------------------|------------------|--------|------------------|--------|
| 180 to 545 days                                    | 43/5,024 (0.9%)     | 213/20,653 (1.0%)     | 0.83 (0.60-1.15) | 0.266  | 0.87 (0.68-1.12) | 0.269  |
| > 545 days                                         | 41/5,024 (0.8%)     | 141/20,653 (0.7%)     | 1.19 (0.84-1.69) | 0.318  | 1.19 (0.90-1.57) | 0.233  |
| Fasting blood glucose $\geq$ 100 mg/dL (n= 18,313) |                     |                       |                  |        |                  |        |
| < 180 days                                         | 3,662/3,774 (97.0%) | 14,080/14,539 (96.8%) | 1                |        | 1                |        |
| 180 to 545 days                                    | 54/3,774 (1.4%)     | 243/14,539 (1.7%)     | 0.85 (0.63-1.15) | 0.299  | 0.72 (0.57-0.91) | 0.006* |
| > 545 days                                         | 58/3,774 (1.5%)     | 216/14,539 (1.5%)     | 1.03 (0.77-1.38) | 0.831  | 0.94 (0.74-1.18) | 0.586  |
| Total cholesterol < 200 mg/dL (n= 25,042)          |                     |                       |                  |        |                  |        |
| < 180 days                                         | 5,090/5,231 (97.3%) | 19,281/19,811 (97.3%) | 1                |        | 1                |        |
| 180 to 545 days                                    | 64/5,231 (1.2%)     | 258/19,811 (1.3%)     | 0.94 (0.71-1.24) | 0.658  | 0.83 (0.67-1.04) | 0.100  |
| > 545 days                                         | 77/5,231 (1.5%)     | 272/19,811 (1.4%)     | 1.07 (0.83-1.38) | 0.591  | 1.06 (0.86-1.29) | 0.604  |
| Total cholesterol $\geq$ 200 mg/dL (n= 18,948)     |                     |                       |                  |        |                  |        |
| < 180 days                                         | 3,512/3,567 (98.5%) | 15,098/15,381 (98.2%) | 1                |        | 1                |        |
| 180 to 545 days                                    | 33/3,567 (0.9%)     | 198/15,381 (1.3%)     | 0.72 (0.49-1.04) | 0.078  | 0.67 (0.51-0.89) | 0.005* |
| > 545 days                                         | 22/3,567 (0.6%)     | 85/15,381 (0.6%)      | 1.11 (0.70-1.78) | 0.656  | 0.82 (0.55-1.20) | 0.305  |
| CCI scores = 0 (n= 26,666)                         |                     |                       |                  |        |                  |        |
| < 180 days                                         | 3,164/3,212 (98.5%) | 23,088/23,454 (98.4%) | 1                |        | 1                |        |
| 180 to 545 days                                    | 28/3,212 (0.9%)     | 215/23,454 (0.9%)     | 0.95 (0.64-1.41) | 0.804  | 0.94 (0.72-1.22) | 0.646  |
| > 545 days                                         | 20/3,212 (0.6%)     | 151/23,454 (0.6%)     | 0.97 (0.61-1.54) | 0.888  | 0.96 (0.70-1.31) | 0.785  |
| CCI scores = 1 (n= 7,848)                          |                     |                       |                  |        |                  |        |
| < 180 days                                         | 1,921/1,972 (97.4%) | 5,669/5,876 (96.5%)   | 1                |        | 1                |        |
| 180 to 545 days                                    | 19/1,972 (1.0%)     | 110/5,876 (1.9%)      | 0.51 (0.31-0.83) | 0.007* | 0.52 (0.35-0.77) | 0.001* |
| > 545 days                                         | 32/1,972 (1.6%)     | 97/5,876 (1.7%)       | 0.97 (0.65-1.46) | 0.896  | 1.10 (0.76-1.60) | 0.599  |
| CCI scores $\geq$ 2 (n= 9,476)                     |                     |                       |                  |        |                  |        |
| < 180 days                                         | 3,517/3,614 (97.3%) | 5,622/5,862 (95.9%)   | 1                |        | 1                |        |
| 180 to 545 days                                    | 50/3,614 (1.4%)     | 131/5,862 (2.2%)      | 0.61 (0.44-0.85) | 0.003* | 0.82 (0.60-1.11) | 0.204  |
| > 545 days                                         | 47/3,614 (1.3%)     | 109/5,862 (1.9%)      | 0.69 (0.49-0.97) | 0.034* | 1.00 (0.72-1.38) | 0.993  |
| Non dyslipidemia history (n= 25,900)               |                     |                       |                  |        |                  |        |
| < 180 days                                         | 5,485/5,514 (99.5%) | 20,286/20,386 (99.5%) | 1                |        | 1                |        |
| 180 to 545 days                                    | 13/5,514 (0.2%)     | 59/20,386 (0.3%)      | 0.81 (0.45-1.49) | 0.505  | 0.60 (0.38-0.96) | 0.034* |
| > 545 days                                         | 16/5,514 (0.3%)     | 41/20,386 (0.2%)      | 1.44 (0.81-2.57) | 0.213  | 1.12 (0.71-1.76) | 0.631  |
| Dyslipidemia history (n= 18,090)                   |                     |                       |                  |        |                  |        |
| < 180 days                                         | 3,117/3,284 (94.9%) | 14,093/14,806 (95.2%) | 1                |        | 1                |        |
| 180 to 545 days                                    | 84/3,284 (2.6%)     | 397/14,806 (2.7%)     | 0.96 (0.75-1.21) | 0.716  | 0.80 (0.67-0.96) | 0.018* |
| > 545 days                                         | 83/3,284 (2.5%)     | 316/14,806 (2.1%)     | 1.19 (0.93-1.52) | 0.169  | 0.98 (0.81-1.19) | 0.855  |

Abbreviations: CCI, Charlson Comorbidity Index; SBP, Systolic blood pressure; DBP, Diastolic blood pressure

\* Significance at  $P < 0.05$

† Adjusted for age, sex, income, region of residence, SBP, DBP, fasting blood glucose, total cholesterol, obesity, smoking, alcohol consumption, dyslipidemia history, and CCI scores.

**Supplementary Table S3** Crude and overlap propensity score weighted odd ratios of dates of lipophilic statin prescription for gastric cancer.

| Characteristics                | N of<br>gastric cancer | N of<br>Control       | Odd ratios for gastric cancer (95% confidence interval) |         |                          |         |
|--------------------------------|------------------------|-----------------------|---------------------------------------------------------|---------|--------------------------|---------|
|                                | (exposure/total, %)    | (exposure/total, %)   | Crude                                                   | P-value | Overlap weighted model † | P-value |
| Age < 65 years old (n= 20,780) |                        |                       |                                                         |         |                          |         |
| < 180 days                     | 3,816/4,156 (91.8%)    | 15,197/16,624 (91.4%) | 1                                                       |         | 1                        |         |
| 180 to 545 days                | 192/4,156 (4.6%)       | 794/16,624 (4.8%)     | 0.96 (0.82-1.13)                                        | 0.648   | 1.02 (0.89-1.16)         | 0.787   |
| > 545 days                     | 148/4,156 (3.6%)       | 633/16,624 (3.8%)     | 0.93 (0.78-1.12)                                        | 0.443   | 0.97 (0.84-1.13)         | 0.719   |
| Age ≥ 65 years old (n= 23,210) |                        |                       |                                                         |         |                          |         |
| < 180 days                     | 4,075/4,642 (87.8%)    | 16,049/18,568 (86.4%) | 1                                                       |         | 1                        |         |
| 180 to 545 days                | 272/4,642 (5.9%)       | 1,226/18,568 (6.6%)   | 0.87 (0.76-1.00)                                        | 0.052   | 0.85 (0.76-0.95)         | 0.006*  |
| > 545 days                     | 295/4,642 (6.4%)       | 1,293/18,568 (7.0%)   | 0.90 (0.79-1.02)                                        | 0.110   | 0.93 (0.84-1.04)         | 0.205   |
| Male (n= 32,355)               |                        |                       |                                                         |         |                          |         |
| < 180 days                     | 5,863/6,471 (90.6%)    | 23,274/25,884 (89.9%) | 1                                                       |         | 1                        |         |
| 180 to 545 days                | 312/6,471 (4.8%)       | 1,298/25,884 (5.0%)   | 0.95 (0.84-1.08)                                        | 0.469   | 0.92 (0.83-1.02)         | 0.119   |
| > 545 days                     | 296/6,471 (4.6%)       | 1,312/25,884 (5.1%)   | 0.90 (0.79-1.02)                                        | 0.095   | 0.91 (0.82-1.01)         | 0.084   |
| Female (n= 11,635)             |                        |                       |                                                         |         |                          |         |
| < 180 days                     | 2,028/2,327 (87.2%)    | 7,972/9,308 (85.6%)   | 1                                                       |         | 1                        |         |
| 180 to 545 days                | 152/2,327 (6.5%)       | 722/9,308 (7.8%)      | 0.83 (0.69-0.99)                                        | 0.041*  | 0.90 (0.78-1.05)         | 0.182   |
| > 545 days                     | 147/2,327 (6.3%)       | 614/9,308 (6.6%)      | 0.94 (0.78-1.13)                                        | 0.524   | 1.05 (0.90-1.23)         | 0.512   |
| Low income groups (n= 19,375)  |                        |                       |                                                         |         |                          |         |
| < 180 days                     | 3,470/3,875 (89.5%)    | 13,894/15,500 (89.6%) | 1                                                       |         | 1                        |         |
| 180 to 545 days                | 222/3,875 (5.7%)       | 847/15,500 (5.5%)     | 1.05 (0.90-1.22)                                        | 0.535   | 1.06 (0.93-1.20)         | 0.383   |
| > 545 days                     | 183/3,875 (4.7%)       | 759/15,500 (4.9%)     | 0.97 (0.82-1.14)                                        | 0.677   | 1.05 (0.91-1.20)         | 0.510   |
| High income groups (n= 24,615) |                        |                       |                                                         |         |                          |         |
| < 180 days                     | 4,421/4,923 (89.8%)    | 17,352/19,692 (88.1%) | 1                                                       |         | 1                        |         |
| 180 to 545 days                | 242/4,923 (4.9%)       | 1,173/19,692 (6.0%)   | 0.81 (0.70-0.93)                                        | 0.004*  | 0.82 (0.73-0.91)         | 0.001*  |
| > 545 days                     | 260/4,923 (5.3%)       | 1,167/19,692 (5.9%)   | 0.87 (0.76-1.00)                                        | 0.058   | 0.90 (0.80-1.01)         | 0.069   |
| Urban residents (n= 18,070)    |                        |                       |                                                         |         |                          |         |
| < 180 days                     | 3,219/3,614 (89.1%)    | 12,677/14,456 (87.7%) | 1                                                       |         | 1                        |         |
| 180 to 545 days                | 199/3,614 (5.5%)       | 898/14,456 (6.2%)     | 0.87 (0.74-1.02)                                        | 0.092   | 0.88 (0.77-1.00)         | 0.047*  |
| > 545 days                     | 196/3,614 (5.4%)       | 881/14,456 (6.1%)     | 0.88 (0.75-1.03)                                        | 0.104   | 0.92 (0.81-1.05)         | 0.238   |
| Rural residents (n= 25,920)    |                        |                       |                                                         |         |                          |         |
| < 180 days                     | 4,672/5,184 (90.1%)    | 18,569/20,736 (89.5%) | 1                                                       |         | 1                        |         |
| 180 to 545 days                | 265/5,184 (5.1%)       | 1,122/20,736 (5.4%)   | 0.94 (0.82-1.08)                                        | 0.368   | 0.95 (0.85-1.06)         | 0.351   |
| > 545 days                     | 247/5,184 (4.8%)       | 1,045/20,736 (5.0%)   | 0.94 (0.81-1.08)                                        | 0.390   | 0.98 (0.87-1.10)         | 0.766   |
| Underweight (n= 1,306)         |                        |                       |                                                         |         |                          |         |
| < 180 days                     | 322/333 (96.7%)        | 922/973 (94.8%)       | 1                                                       |         | 1                        |         |
| 180 to 545 days                | 6/333 (1.8%)           | 29/973 (3.0%)         | 0.59 (0.24-1.44)                                        | 0.248   | 0.74 (0.35-1.57)         | 0.436   |

|                                                |                     |                       |                  |        |                  |        |
|------------------------------------------------|---------------------|-----------------------|------------------|--------|------------------|--------|
| > 545 days                                     | 5/333 (1.5%)        | 22/973 (2.3%)         | 0.65 (0.24-1.73) | 0.390  | 0.85 (0.35-2.03) | 0.709  |
| Normal weight (n= 15,700)                      |                     |                       |                  |        |                  |        |
| < 180 days                                     | 3,007/3,240 (92.8%) | 11,451/12,460 (91.9%) | 1                |        | 1                |        |
| 180 to 545 days                                | 125/3,240 (3.9%)    | 542/12,460 (4.3%)     | 0.88 (0.72-1.07) | 0.200  | 0.89 (0.75-1.04) | 0.144  |
| > 545 days                                     | 108/3,240 (3.3%)    | 467/12,460 (3.7%)     | 0.88 (0.71-1.09) | 0.243  | 0.90 (0.75-1.07) | 0.234  |
| Overweight (n= 11,986)                         |                     |                       |                  |        |                  |        |
| < 180 days                                     | 2,016/2,285 (88.2%) | 8,623/9,701 (88.9%)   | 1                |        | 1                |        |
| 180 to 545 days                                | 142/2,285 (6.2%)    | 545/9,701 (5.6%)      | 1.11 (0.92-1.35) | 0.266  | 1.09 (0.93-1.27) | 0.306  |
| > 545 days                                     | 127/2,285 (5.6%)    | 533/9,701 (5.5%)      | 1.02 (0.83-1.24) | 0.852  | 1.04 (0.88-1.22) | 0.668  |
| Obese (n= 14,998)                              |                     |                       |                  |        |                  |        |
| < 180 days                                     | 2,546/2,940 (86.6%) | 10,250/12,058 (85.0%) | 1                |        | 1                |        |
| 180 to 545 days                                | 191/2,940 (6.5%)    | 904/12,058 (7.5%)     | 0.85 (0.72-1.00) | 0.050  | 0.84 (0.74-0.96) | 0.008* |
| > 545 days                                     | 203/2,940 (6.9%)    | 904/12,058 (7.5%)     | 0.90 (0.77-1.06) | 0.212  | 0.95 (0.83-1.08) | 0.390  |
| Non-smoker (n= 26,498)                         |                     |                       |                  |        |                  |        |
| < 180 days                                     | 4,456/4,997 (89.2%) | 19,029/21,501 (88.5%) | 1                |        | 1                |        |
| 180 to 545 days                                | 273/4,997 (5.5%)    | 1,291/21,501 (6.0%)   | 0.90 (0.79-1.03) | 0.138  | 0.92 (0.83-1.03) | 0.141  |
| > 545 days                                     | 268/4,997 (5.4%)    | 1,181/21,501 (5.5%)   | 0.97 (0.85-1.11) | 0.652  | 1.05 (0.94-1.18) | 0.356  |
| Past and current smoker (n= 17,492)            |                     |                       |                  |        |                  |        |
| < 180 days                                     | 3,435/3,801 (90.4%) | 12,217/13,691 (89.2%) | 1                |        | 1                |        |
| 180 to 545 days                                | 191/3,801 (5.0%)    | 729/13,691 (5.3%)     | 0.93 (0.79-1.10) | 0.398  | 0.90 (0.78-1.03) | 0.139  |
| > 545 days                                     | 175/3,801 (4.6%)    | 745/13,691 (5.4%)     | 0.84 (0.71-0.99) | 0.037* | 0.83 (0.72-0.95) | 0.009* |
| Alcohol consumption <1 time a week (n= 26,085) |                     |                       |                  |        |                  |        |
| < 180 days                                     | 4,400/4,893 (89.9%) | 18,754/21,192 (88.5%) | 1                |        | 1                |        |
| 180 to 545 days                                | 258/4,893 (5.3%)    | 1,242/21,192 (5.9%)   | 0.89 (0.77-1.02) | 0.084  | 0.92 (0.82-1.02) | 0.115  |
| > 545 days                                     | 235/4,893 (4.8%)    | 1,196/21,192 (5.6%)   | 0.84 (0.73-0.97) | 0.016* | 0.92 (0.82-1.03) | 0.166  |
| Alcohol consumption ≥1 time a week (n= 17,905) |                     |                       |                  |        |                  |        |
| < 180 days                                     | 3,491/3,905 (89.4%) | 12,492/14,000 (89.2%) | 1                |        | 1                |        |
| 180 to 545 days                                | 206/3,905 (5.3%)    | 778/14,000 (5.6%)     | 0.95 (0.81-1.11) | 0.504  | 0.90 (0.79-1.04) | 0.144  |
| > 545 days                                     | 208/3,905 (5.3%)    | 730/14,000 (5.2%)     | 1.02 (0.87-1.19) | 0.811  | 0.99 (0.87-1.14) | 0.934  |
| SBP < 140 mmHg and DBP < 90 mmHg (n= 31,460)   |                     |                       |                  |        |                  |        |
| < 180 days                                     | 5,687/6,300 (90.3%) | 22,410/25,160 (89.1%) | 1                |        | 1                |        |
| 180 to 545 days                                | 301/6,300 (4.8%)    | 1,369/25,160 (5.4%)   | 0.87 (0.76-0.98) | 0.028* | 0.90 (0.81-1.00) | 0.040* |
| > 545 days                                     | 312/6,300 (5.0%)    | 1,381/25,160 (5.5%)   | 0.89 (0.78-1.01) | 0.071  | 0.92 (0.82-1.02) | 0.098  |
| SBP ≥ 140 mmHg or DBP ≥ 90 mmHg (n= 12,530)    |                     |                       |                  |        |                  |        |
| < 180 days                                     | 2,204/2,498 (88.2%) | 8,836/10,032 (88.1%)  | 1                |        | 1                |        |
| 180 to 545 days                                | 163/2,498 (6.5%)    | 651/10,032 (6.5%)     | 1.00 (0.84-1.20) | 0.967  | 0.96 (0.83-1.11) | 0.602  |
| > 545 days                                     | 131/2,498 (5.2%)    | 545/10,032 (5.4%)     | 0.96 (0.79-1.17) | 0.714  | 1.05 (0.90-1.24) | 0.522  |
| Fasting blood glucose < 100 mg/dL (n= 25,677)  |                     |                       |                  |        |                  |        |
| < 180 days                                     | 4,622/5,024 (92.0%) | 18,847/20,653 (91.3%) | 1                |        | 1                |        |
| 180 to 545 days                                | 219/5,024 (4.4%)    | 973/20,653 (4.7%)     | 0.92 (0.79-1.07) | 0.263  | 0.97 (0.86-1.10) | 0.660  |



|                                                    |                     |                       |                  |         |                  |         |
|----------------------------------------------------|---------------------|-----------------------|------------------|---------|------------------|---------|
| > 545 days                                         | 183/5,024 (3.6%)    | 833/20,653 (4.0%)     | 0.90 (0.76-1.05) | 0.186   | 0.91 (0.80-1.04) | 0.174   |
| Fasting blood glucose $\geq$ 100 mg/dL (n= 18,313) |                     |                       |                  |         |                  |         |
| < 180 days                                         | 3,269/3,774 (86.6%) | 12,399/14,539 (85.3%) | 1                |         | 1                |         |
| 180 to 545 days                                    | 245/3,774 (6.5%)    | 1,047/14,539 (7.2%)   | 0.89 (0.77-1.03) | 0.105   | 0.87 (0.78-0.98) | 0.026*  |
| > 545 days                                         | 260/3,774 (6.9%)    | 1,093/14,539 (7.5%)   | 0.90 (0.78-1.04) | 0.152   | 0.98 (0.87-1.10) | 0.741   |
| Total cholesterol < 200 mg/dL (n= 25,042)          |                     |                       |                  |         |                  |         |
| < 180 days                                         | 4,635/5,231 (88.6%) | 17,441/19,811 (88.0%) | 1                |         | 1                |         |
| 180 to 545 days                                    | 255/5,231 (4.9%)    | 985/19,811 (5.0%)     | 0.97 (0.85-1.12) | 0.717   | 0.92 (0.82-1.04) | 0.195   |
| > 545 days                                         | 341/5,231 (6.5%)    | 1,385/19,811 (7.0%)   | 0.93 (0.82-1.05) | 0.223   | 0.96 (0.86-1.07) | 0.440   |
| Total cholesterol $\geq$ 200 mg/dL (n= 18,948)     |                     |                       |                  |         |                  |         |
| < 180 days                                         | 3,256/3,567 (91.3%) | 13,805/15,381 (89.8%) | 1                |         | 1                |         |
| 180 to 545 days                                    | 209/3,567 (5.9%)    | 1,035/15,381 (6.7%)   | 0.86 (0.73-1.00) | 0.047*  | 0.90 (0.79-1.01) | 0.083   |
| > 545 days                                         | 102/3,567 (2.9%)    | 541/15,381 (3.5%)     | 0.80 (0.64-0.99) | 0.041*  | 0.87 (0.74-1.03) | 0.101   |
| CCI scores = 0 (n= 26,666)                         |                     |                       |                  |         |                  |         |
| < 180 days                                         | 2,923/3,212 (91.0%) | 21,224/23,454 (90.5%) | 1                |         | 1                |         |
| 180 to 545 days                                    | 154/3,212 (4.8%)    | 1,171/23,454 (5.0%)   | 0.95 (0.80-1.13) | 0.600   | 0.98 (0.87-1.10) | 0.746   |
| > 545 days                                         | 135/3,212 (4.2%)    | 1,059/23,454 (4.5%)   | 0.93 (0.77-1.11) | 0.409   | 0.93 (0.82-1.06) | 0.268   |
| CCI scores = 1 (n= 7,848)                          |                     |                       |                  |         |                  |         |
| < 180 days                                         | 1,739/1,972 (88.2%) | 5,060/5,876 (86.1%)   | 1                |         | 1                |         |
| 180 to 545 days                                    | 105/1,972 (5.3%)    | 392/5,876 (6.7%)      | 0.78 (0.62-0.97) | 0.028*  | 0.87 (0.71-1.06) | 0.158   |
| > 545 days                                         | 128/1,972 (6.5%)    | 424/5,876 (7.2%)      | 0.88 (0.72-1.08) | 0.215   | 1.03 (0.85-1.25) | 0.765   |
| CCI scores $\geq$ 2 (n= 9,476)                     |                     |                       |                  |         |                  |         |
| < 180 days                                         | 3,229/3,614 (89.3%) | 4,962/5,862 (84.6%)   | 1                |         | 1                |         |
| 180 to 545 days                                    | 205/3,614 (5.7%)    | 457/5,862 (7.8%)      | 0.69 (0.58-0.82) | <0.001* | 0.87 (0.74-1.03) | 0.117   |
| > 545 days                                         | 180/3,614 (5.0%)    | 443/5,862 (7.6%)      | 0.62 (0.52-0.75) | <0.001* | 0.90 (0.75-1.07) | 0.216   |
| Non dyslipidemia history (n= 25,900)               |                     |                       |                  |         |                  |         |
| < 180 days                                         | 5,425/5,514 (98.4%) | 19,961/20,386 (97.9%) | 1                |         | 1                |         |
| 180 to 545 days                                    | 53/5,514 (1.0%)     | 235/20,386 (1.2%)     | 0.83 (0.62-1.12) | 0.222   | 0.70 (0.55-0.88) | 0.002*  |
| > 545 days                                         | 36/5,514 (0.7%)     | 190/20,386 (0.9%)     | 0.70 (0.49-1.00) | 0.048*  | 0.59 (0.45-0.77) | <0.001* |
| Dyslipidemia history (n= 18,090)                   |                     |                       |                  |         |                  |         |
| < 180 days                                         | 2,466/3,284 (75.1%) | 11,285/14,806 (76.2%) | 1                |         | 1                |         |
| 180 to 545 days                                    | 411/3,284 (12.5%)   | 1,785/14,806 (12.1%)  | 1.05 (0.94-1.18) | 0.376   | 0.96 (0.88-1.06) | 0.436   |
| > 545 days                                         | 407/3,284 (12.4%)   | 1,736/14,806 (11.7%)  | 1.07 (0.95-1.21) | 0.236   | 0.98 (0.90-1.08) | 0.708   |

Abbreviations: CCI, Charlson Comorbidity Index; SBP, Systolic blood pressure; DBP, Diastolic blood pressure

\* Significance at  $P < 0.05$

† Adjusted for age, sex, income, region of residence, SBP, DBP, fasting blood glucose, total cholesterol, obesity, smoking, alcohol consumption, dyslipidemia history, and CCI scores.

**Supplementary Table S4** Crude and overlap propensity score weighted odd ratios of dates of statin prescription for mortality in gastric cancer participants.

| Characteristics               | Dead participants   | Survived participants | Odd ratios for mortality (95% confidence interval) |         |                          |         |
|-------------------------------|---------------------|-----------------------|----------------------------------------------------|---------|--------------------------|---------|
|                               | (exposure/total, %) | (exposure/total, %)   | Crude                                              | P-value | Overlap weighted model † | P-value |
| Age < 65 years old (n= 4,156) |                     |                       |                                                    |         |                          |         |
| < 180 days                    | 690/737 (93.6%)     | 3,069/3,419 (89.8%)   | 1                                                  |         | 1                        |         |
| 180 to 545 days               | 26/737 (3.5%)       | 182/3,419 (5.3%)      | 0.64 (0.42-0.97)                                   | 0.034*  | 1.07 (0.77-1.50)         | 0.684   |
| > 545 days                    | 21/737 (2.8%)       | 168/3,419 (4.9%)      | 0.56 (0.35-0.88)                                   | 0.013*  | 1.10 (0.76-1.60)         | 0.608   |
| Age ≥ 65 years old (n= 4,642) |                     |                       |                                                    |         |                          |         |
| < 180 days                    | 1,414/1,572 (89.9%) | 2,547/3,070 (83.0%)   | 1                                                  |         | 1                        |         |
| 180 to 545 days               | 83/1,572 (5.3%)     | 209/3,070 (6.8%)      | 0.72 (0.55-0.93)                                   | 0.012*  | 1.17 (0.90-1.52)         | 0.236   |
| > 545 days                    | 75/1,572 (4.8%)     | 314/3,070 (10.2%)     | 0.43 (0.33-0.56)                                   | <0.001* | 0.80 (0.62-1.04)         | 0.091   |
| Male (n= 6,471)               |                     |                       |                                                    |         |                          |         |
| < 180 days                    | 1,617/1,761 (91.8%) | 4,123/4,710 (87.5%)   | 1                                                  |         | 1                        |         |
| 180 to 545 days               | 74/1,761 (4.2%)     | 261/4,710 (5.5%)      | 0.72 (0.55-0.94)                                   | 0.016*  | 0.97 (0.76-1.24)         | 0.828   |
| > 545 days                    | 70/1,761 (4.0%)     | 326/4,710 (6.9%)      | 0.55 (0.42-0.71)                                   | <0.001* | 0.86 (0.68-1.10)         | 0.231   |
| Female (n= 2,327)             |                     |                       |                                                    |         |                          |         |
| < 180 days                    | 487/548 (88.9%)     | 1,493/1,779 (83.9%)   | 1                                                  |         | 1                        |         |
| 180 to 545 days               | 35/548 (6.4%)       | 130/1,779 (7.3%)      | 0.83 (0.56-1.22)                                   | 0.331   | 1.70 (1.20-2.42)         | 0.003*  |
| > 545 days                    | 26/548 (4.7%)       | 156/1,779 (8.8%)      | 0.51 (0.33-0.78)                                   | 0.002*  | 0.76 (0.52-1.11)         | 0.156   |
| Low income groups (n= 3,875)  |                     |                       |                                                    |         |                          |         |
| < 180 days                    | 1,043/1,150 (90.7%) | 2,351/2,725 (86.3%)   | 1                                                  |         | 1                        |         |
| 180 to 545 days               | 60/1,150 (5.2%)     | 179/2,725 (6.6%)      | 0.76 (0.56-1.02)                                   | 0.068   | 1.09 (0.82-1.45)         | 0.553   |
| > 545 days                    | 47/1,150 (4.1%)     | 195/2,725 (7.2%)      | 0.54 (0.39-0.75)                                   | <0.001* | 1.11 (0.80-1.54)         | 0.519   |
| High income groups (n= 4,923) |                     |                       |                                                    |         |                          |         |
| < 180 days                    | 1,061/1,159 (91.5%) | 3,265/3,764 (86.7%)   | 1                                                  |         | 1                        |         |
| 180 to 545 days               | 49/1,159 (4.2%)     | 212/3,764 (5.6%)      | 0.71 (0.52-0.98)                                   | 0.036*  | 1.24 (0.93-1.64)         | 0.137   |
| > 545 days                    | 49/1,159 (4.2%)     | 287/3,764 (7.6%)      | 0.53 (0.39-0.72)                                   | <0.001* | 0.69 (0.53-0.90)         | 0.006*  |
| Urban residents (n= 3,614)    |                     |                       |                                                    |         |                          |         |
| < 180 days                    | 790/878 (90.0%)     | 2,342/2,736 (85.6%)   | 1                                                  |         | 1                        |         |
| 180 to 545 days               | 45/878 (5.1%)       | 179/2,736 (6.5%)      | 0.75 (0.53-1.04)                                   | 0.087   | 1.03 (0.76-1.40)         | 0.850   |
| > 545 days                    | 43/878 (4.9%)       | 215/2,736 (7.9%)      | 0.59 (0.42-0.83)                                   | 0.002*  | 0.72 (0.53-0.96)         | 0.028*  |
| Rural residents (n= 5,184)    |                     |                       |                                                    |         |                          |         |
| < 180 days                    | 1,314/1,431 (91.8%) | 3,274/3,753 (87.2%)   | 1                                                  |         | 1                        |         |
| 180 to 545 days               | 64/1,431 (4.5%)     | 212/3,753 (5.6%)      | 0.75 (0.56-1.00)                                   | 0.052   | 1.26 (0.97-1.64)         | 0.084   |
| > 545 days                    | 53/1,431 (3.7%)     | 267/3,753 (7.1%)      | 0.49 (0.37-0.67)                                   | <0.001* | 0.95 (0.72-1.26)         | 0.722   |
| Underweight (n= 333)          |                     |                       |                                                    |         |                          |         |
| < 180 days                    | 164/168 (97.6%)     | 156/165 (94.5%)       | 1                                                  |         | 1                        |         |
| 180 to 545 days               | 2/168 (1.2%)        | 4/165 (2.4%)          | 0.48 (0.09-2.63)                                   | 0.395   | N/A                      |         |
| > 545 days                    | 2/168 (1.2%)        | 5/165 (3.0%)          | 0.38 (0.07-1.99)                                   | 0.253   | 0.62 (0.07-5.58)         | 0.671   |

|                                               |                     |                     |                  |         |                  |        |
|-----------------------------------------------|---------------------|---------------------|------------------|---------|------------------|--------|
| Normal weight (n= 3,240)                      |                     |                     |                  |         |                  |        |
| < 180 days                                    | 870/934 (93.1%)     | 2,087/2,306 (90.5%) | 1                |         | 1                |        |
| 180 to 545 days                               | 35/934 (3.7%)       | 104/2,306 (4.5%)    | 0.81 (0.55-1.19) | 0.283   | 1.54 (1.07-2.23) | 0.020* |
| > 545 days                                    | 29/934 (3.1%)       | 115/2,306 (5.0%)    | 0.61 (0.40-0.92) | 0.018*  | 0.94 (0.64-1.39) | 0.765  |
| Overweight (n= 2,285)                         |                     |                     |                  |         |                  |        |
| < 180 days                                    | 507/560 (90.5%)     | 1,463/1,725 (84.8%) | 1                |         | 1                |        |
| 180 to 545 days                               | 28/560 (5.0%)       | 122/1,725 (7.1%)    | 0.66 (0.43-1.01) | 0.056   | 0.68 (0.47-1.00) | 0.049* |
| > 545 days                                    | 25/560 (4.5%)       | 140/1,725 (8.1%)    | 0.52 (0.33-0.80) | 0.003*  | 0.68 (0.47-1.00) | 0.049* |
| Obese (n= 2,940)                              |                     |                     |                  |         |                  |        |
| < 180 days                                    | 563/647 (87.0%)     | 1,910/2,293 (83.3%) | 1                |         | 1                |        |
| 180 to 545 days                               | 44/647 (6.8%)       | 161/2,293 (7.0%)    | 0.93 (0.66-1.31) | 0.669   | 1.26 (0.93-1.71) | 0.142  |
| > 545 days                                    | 40/647 (6.2%)       | 222/2,293 (9.7%)    | 0.61 (0.43-0.87) | 0.006*  | 0.95 (0.70-1.28) | 0.719  |
| Non-smoker (n= 4,997)                         |                     |                     |                  |         |                  |        |
| < 180 days                                    | 1,232/1,355 (90.9%) | 3,135/3,642 (86.1%) | 1                |         | 1                |        |
| 180 to 545 days                               | 68/1,355 (5.0%)     | 218/3,642 (6.0%)    | 0.79 (0.60-1.05) | 0.106   | 1.31 (1.01-1.70) | 0.045* |
| > 545 days                                    | 55/1,355 (4.1%)     | 289/3,642 (7.9%)    | 0.48 (0.36-0.65) | <0.001* | 0.74 (0.57-0.97) | 0.027* |
| Past and current smoker (n= 3,801)            |                     |                     |                  |         |                  |        |
| < 180 days                                    | 872/954 (91.4%)     | 2,481/2,847 (87.1%) | 1                |         | 1                |        |
| 180 to 545 days                               | 41/954 (4.3%)       | 173/2,847 (6.1%)    | 0.67 (0.48-0.96) | 0.027*  | 0.99 (0.73-1.35) | 0.954  |
| > 545 days                                    | 41/954 (4.3%)       | 193/2,847 (6.8%)    | 0.60 (0.43-0.85) | 0.004*  | 1.03 (0.75-1.43) | 0.848  |
| Alcohol consumption <1 time a week (n= 4,893) |                     |                     |                  |         |                  |        |
| < 180 days                                    | 1,376/1,508 (91.2%) | 2,934/3,385 (86.7%) | 1                |         | 1                |        |
| 180 to 545 days                               | 65/1,508 (4.3%)     | 215/3,385 (6.4%)    | 0.64 (0.49-0.86) | 0.003*  | 1.04 (0.80-1.35) | 0.786  |
| > 545 days                                    | 67/1,508 (4.4%)     | 236/3,385 (7.0%)    | 0.61 (0.46-0.80) | <0.001* | 0.98 (0.75-1.28) | 0.894  |
| Alcohol consumption ≥1 time a week (n= 3,905) |                     |                     |                  |         |                  |        |
| < 180 days                                    | 728/801 (90.9%)     | 2,682/3,104 (86.4%) | 1                |         | 1                |        |
| 180 to 545 days                               | 44/801 (5.5%)       | 176/3,104 (5.7%)    | 0.92 (0.66-1.29) | 0.636   | 1.42 (1.05-1.93) | 0.023* |
| > 545 days                                    | 29/801 (3.6%)       | 246/3,104 (7.9%)    | 0.43 (0.29-0.64) | <0.001* | 0.66 (0.48-0.90) | 0.010* |
| SBP < 140 mmHg and DBP < 90 mmHg (n= 6,300)   |                     |                     |                  |         |                  |        |
| < 180 days                                    | 1,411/1,522 (92.7%) | 4,152/4,778 (86.9%) | 1                |         | 1                |        |
| 180 to 545 days                               | 56/1,522 (3.7%)     | 269/4,778 (5.6%)    | 0.61 (0.46-0.82) | 0.001*  | 1.09 (0.84-1.40) | 0.511  |
| > 545 days                                    | 55/1,522 (3.6%)     | 357/4,778 (7.5%)    | 0.45 (0.34-0.61) | <0.001* | 0.72 (0.56-0.93) | 0.011* |
| SBP ≥ 140 mmHg or DBP ≥ 90 mmHg (n= 2,498)    |                     |                     |                  |         |                  |        |
| < 180 days                                    | 693/787 (88.1%)     | 1,464/1,711 (85.6%) | 1                |         | 1                |        |
| 180 to 545 days                               | 53/787 (6.7%)       | 122/1,711 (7.1%)    | 0.92 (0.66-1.28) | 0.615   | 1.22 (0.88-1.70) | 0.235  |
| > 545 days                                    | 41/787 (5.2%)       | 125/1,711 (7.3%)    | 0.69 (0.48-1.00) | 0.048*  | 1.07 (0.75-1.52) | 0.713  |
| Fasting blood glucose < 100 mg/dL (n= 5,024)  |                     |                     |                  |         |                  |        |
| < 180 days                                    | 1,232/1,324 (93.1%) | 3,315/3,700 (89.6%) | 1                |         | 1                |        |
| 180 to 545 days                               | 50/1,324 (3.8%)     | 186/3,700 (5.0%)    | 0.72 (0.53-1.00) | 0.047*  | 1.11 (0.83-1.48) | 0.490  |
| > 545 days                                    | 42/1,324 (3.2%)     | 199/3,700 (5.4%)    | 0.57 (0.40-0.80) | 0.001*  | 0.79 (0.58-1.09) | 0.152  |

|                                                   |                     |                     |                  |         |                  |        |
|---------------------------------------------------|---------------------|---------------------|------------------|---------|------------------|--------|
| Fasting blood glucose $\geq$ 100 mg/dL (n= 3,774) |                     |                     |                  |         |                  |        |
| < 180 days                                        | 872/985 (88.5%)     | 2,301/2,789 (82.5%) | 1                |         | 1                |        |
| 180 to 545 days                                   | 59/985 (6.0%)       | 205/2,789 (7.4%)    | 0.76 (0.56-1.03) | 0.072   | 1.21 (0.92-1.59) | 0.177  |
| > 545 days                                        | 54/985 (5.5%)       | 283/2,789 (10.1%)   | 0.50 (0.37-0.68) | <0.001* | 0.89 (0.68-1.17) | 0.397  |
| Total cholesterol < 200 mg/dL (n= 5,231)          |                     |                     |                  |         |                  |        |
| < 180 days                                        | 1,335/1,451 (92.0%) | 3,177/3,780 (84.0%) | 1                |         | 1                |        |
| 180 to 545 days                                   | 55/1,451 (3.8%)     | 223/3,780 (5.9%)    | 0.59 (0.43-0.79) | 0.001*  | 0.92 (0.70-1.21) | 0.564  |
| > 545 days                                        | 61/1,451 (4.2%)     | 380/3,780 (10.1%)   | 0.38 (0.29-0.50) | <0.001* | 0.64 (0.49-0.83) | 0.001* |
| Total cholesterol $\geq$ 200 mg/dL (n= 3,567)     |                     |                     |                  |         |                  |        |
| < 180 days                                        | 769/858 (89.6%)     | 2,439/2,709 (90.0%) | 1                |         | 1                |        |
| 180 to 545 days                                   | 54/858 (6.3%)       | 168/2,709 (6.2%)    | 1.02 (0.74-1.40) | 0.905   | 1.51 (1.13-2.03) | 0.006* |
| > 545 days                                        | 35/858 (4.1%)       | 102/2,709 (3.8%)    | 1.09 (0.74-1.61) | 0.673   | 1.35 (0.95-1.92) | 0.092  |
| CCI scores = 0 (n= 3,212)                         |                     |                     |                  |         |                  |        |
| < 180 days                                        | 225/245 (91.8%)     | 2,655/2,967 (89.5%) | 1                |         | 1                |        |
| 180 to 545 days                                   | 13/245 (5.3%)       | 153/2,967 (5.2%)    | 1.00 (0.56-1.79) | 0.993   | 1.54 (1.06-2.24) | 0.024* |
| > 545 days                                        | 7/245 (2.9%)        | 159/2,967 (5.4%)    | 0.52 (0.24-1.12) | 0.095   | 0.82 (0.53-1.25) | 0.350  |
| CCI scores = 1 (n= 1,972)                         |                     |                     |                  |         |                  |        |
| < 180 days                                        | 229/248 (92.3%)     | 1,465/1,724 (85.0%) | 1                |         | 1                |        |
| 180 to 545 days                                   | 11/248 (4.4%)       | 100/1,724 (5.8%)    | 0.70 (0.37-1.33) | 0.280   | 1.44 (0.92-2.27) | 0.110  |
| > 545 days                                        | 8/248 (3.2%)        | 159/1,724 (9.2%)    | 0.32 (0.16-0.66) | 0.002*  | 0.62 (0.39-0.98) | 0.040* |
| CCI scores $\geq$ 2 (n= 3,614)                    |                     |                     |                  |         |                  |        |
| < 180 days                                        | 1,650/1,816 (90.9%) | 1,496/1,798 (83.2%) | 1                |         | 1                |        |
| 180 to 545 days                                   | 85/1,816 (4.7%)     | 138/1,798 (7.7%)    | 0.56 (0.42-0.74) | <0.001* | 1.03 (0.77-1.39) | 0.831  |
| > 545 days                                        | 81/1,816 (4.5%)     | 164/1,798 (9.1%)    | 0.45 (0.34-0.59) | <0.001* | 0.97 (0.72-1.31) | 0.844  |
| Non dyslipidemia history (n= 5,514)               |                     |                     |                  |         |                  |        |
| < 180 days                                        | 1,765/1,808 (97.6%) | 3,632/3,706 (98.0%) | 1                |         | 1                |        |
| 180 to 545 days                                   | 25/1,808 (1.4%)     | 34/3,706 (0.9%)     | 1.51 (0.90-2.54) | 0.118   | 1.16 (0.73-1.85) | 0.521  |
| > 545 days                                        | 18/1,808 (1.0%)     | 40/3,706 (1.1%)     | 0.93 (0.53-1.62) | 0.788   | 0.79 (0.45-1.37) | 0.399  |
| Dyslipidemia history (n= 3,284)                   |                     |                     |                  |         |                  |        |
| < 180 days                                        | 339/501 (67.7%)     | 1,984/2,783 (71.3%) | 1                |         | 1                |        |
| 180 to 545 days                                   | 84/501 (16.8%)      | 357/2,783 (12.8%)   | 1.38 (1.06-1.79) | 0.018*  | 1.22 (1.00-1.48) | 0.053  |
| > 545 days                                        | 78/501 (15.6%)      | 442/2,783 (15.9%)   | 1.03 (0.79-1.35) | 0.813   | 0.89 (0.73-1.09) | 0.256  |
| Only surgery (n= 7,259)                           |                     |                     |                  |         |                  |        |
| < 180 days                                        | 1,247/1,377 (90.6%) | 5,075/5,882 (86.3%) | 1                |         | 1                |        |
| 180 to 545 days                                   | 68/1,377 (4.9%)     | 365/5,882 (6.2%)    | 0.76 (0.58-0.99) | 0.042*  | 1.03 (0.83-1.28) | 0.777  |
| > 545 days                                        | 62/1,377 (4.5%)     | 442/5,882 (7.5%)    | 0.57 (0.43-0.75) | <0.001* | 0.85 (0.68-1.07) | 0.164  |
| Surgery+radiotherapy or chemotherapy (n= 1,539)   |                     |                     |                  |         |                  |        |
| < 180 days                                        | 857/932 (92.0%)     | 541/607 (89.1%)     | 1                |         | 1                |        |
| 180 to 545 days                                   | 41/932 (4.4%)       | 26/607 (4.3%)       | 1.00 (0.60-1.65) | 0.986   | 1.65 (0.97-2.81) | 0.067  |
| > 545 days                                        | 34/932 (3.6%)       | 40/607 (6.6%)       | 0.54 (0.34-0.86) | 0.009*  | 0.84 (0.51-1.41) | 0.518  |

Abbreviations: CCI, Charlson Comorbidity Index; SBP, Systolic blood pressure; DBP, Diastolic blood pressure.

\* Significance at  $P < 0.05$

† Adjusted for age, sex, income, region of residence, SBP, DBP, fasting blood glucose, total cholesterol, obesity, smoking, alcohol consumption, dyslipidemia history, CCI scores and treatment type.

**Supplementary Table S5** Crude and overlap propensity score weighted odd ratios of dates of hydrophilic prescription for mortality in gastric cancer participants.

| Characteristics                         | Dead participants   | Survived participants | Odd ratios for mortality (95% confidence interval) |                 |                          |                 |
|-----------------------------------------|---------------------|-----------------------|----------------------------------------------------|-----------------|--------------------------|-----------------|
|                                         | (exposure/total, %) | (exposure/total, %)   | Crude                                              | <i>P</i> -value | Overlap weighted model † | <i>P</i> -value |
| <b>Age &lt; 65 years old (n= 4,156)</b> |                     |                       |                                                    |                 |                          |                 |
| < 180 days                              | 730/737 (99.1%)     | 3,361/3,419 (98.3%)   | 1                                                  |                 | 1                        |                 |
| 180 to 545 days                         | 6/737 (0.8%)        | 31/3,419 (0.9%)       | 0.89 (0.37-2.14)                                   | 0.797           | 0.97 (0.47-1.99)         | 0.933           |
| > 545 days                              | 1/737 (0.1%)        | 27/3,419 (0.8%)       | 0.17 (0.02-1.26)                                   | 0.083           | 0.12 (0.02-0.62)         | 0.012*          |
| <b>Age ≥ 65 years old (n= 4,642)</b>    |                     |                       |                                                    |                 |                          |                 |
| < 180 days                              | 1,544/1,572 (98.2%) | 2,967/3,070 (96.6%)   | 1                                                  |                 | 1                        |                 |
| 180 to 545 days                         | 8/1,572 (0.5%)      | 52/3,070 (1.7%)       | 0.30 (0.14-0.62)                                   | 0.001*          | 0.28 (0.13-0.59)         | 0.001*          |
| > 545 days                              | 20/1,572 (1.3%)     | 51/3,070 (1.7%)       | 0.75 (0.45-1.27)                                   | 0.287           | 1.49 (0.88-2.54)         | 0.142           |
| <b>Male (n= 6,471)</b>                  |                     |                       |                                                    |                 |                          |                 |
| < 180 days                              | 1,740/1,761 (98.8%) | 4,592/4,710 (97.5%)   | 1                                                  |                 | 1                        |                 |
| 180 to 545 days                         | 8/1,761 (0.5%)      | 57/4,710 (1.2%)       | 0.37 (0.18-0.78)                                   | 0.009*          | 0.40 (0.22-0.76)         | 0.005*          |
| > 545 days                              | 13/1,761 (0.7%)     | 61/4,710 (1.3%)       | 0.56 (0.31-1.03)                                   | 0.061           | 0.96 (0.55-1.67)         | 0.888           |
| <b>Female (n= 2,327)</b>                |                     |                       |                                                    |                 |                          |                 |
| < 180 days                              | 534/548 (97.4%)     | 1,736/1,779 (97.6%)   | 1                                                  |                 | 1                        |                 |
| 180 to 545 days                         | 6/548 (1.1%)        | 26/1,779 (1.5%)       | 0.75 (0.31-1.83)                                   | 0.528           | 0.55 (0.25-1.22)         | 0.143           |
| > 545 days                              | 8/548 (1.5%)        | 17/1,779 (1.0%)       | 1.53 (0.66-3.57)                                   | 0.324           | 1.62 (0.76-3.41)         | 0.209           |
| <b>Low income groups (n= 3,875)</b>     |                     |                       |                                                    |                 |                          |                 |
| < 180 days                              | 1,134/1,150 (98.6%) | 2,658/2,725 (97.5%)   | 1                                                  |                 | 1                        |                 |
| 180 to 545 days                         | 8/1,150 (0.7%)      | 33/2,725 (1.2%)       | 0.57 (0.26-1.23)                                   | 0.153           | 0.57 (0.29-1.10)         | 0.095           |
| > 545 days                              | 8/1,150 (0.7%)      | 34/2,725 (1.2%)       | 0.55 (0.25-1.20)                                   | 0.132           | 1.17 (0.55-2.48)         | 0.683           |
| <b>High income groups (n= 4,923)</b>    |                     |                       |                                                    |                 |                          |                 |
| < 180 days                              | 1,140/1,159 (98.4%) | 3,670/3,764 (97.5%)   | 1                                                  |                 | 1                        |                 |
| 180 to 545 days                         | 6/1,159 (0.5%)      | 50/3,764 (1.3%)       | 0.39 (0.17-0.90)                                   | 0.028*          | 0.36 (0.17-0.76)         | 0.007*          |
| > 545 days                              | 13/1,159 (1.1%)     | 44/3,764 (1.2%)       | 0.95 (0.51-1.77)                                   | 0.875           | 1.15 (0.67-1.98)         | 0.601           |
| <b>Urban residents (n= 3,614)</b>       |                     |                       |                                                    |                 |                          |                 |
| < 180 days                              | 863/878 (98.3%)     | 2,650/2,736 (96.9%)   | 1                                                  |                 | 1                        |                 |
| 180 to 545 days                         | 8/878 (0.9%)        | 49/2,736 (1.8%)       | 0.50 (0.24-1.06)                                   | 0.072           | 0.32 (0.16-0.63)         | 0.001*          |
| > 545 days                              | 7/878 (0.8%)        | 37/2,736 (1.4%)       | 0.58 (0.26-1.31)                                   | 0.190           | 0.59 (0.31-1.16)         | 0.126           |
| <b>Rural residents (n= 5,184)</b>       |                     |                       |                                                    |                 |                          |                 |

|                                               |                     |                     |                  |        |                  |        |
|-----------------------------------------------|---------------------|---------------------|------------------|--------|------------------|--------|
| < 180 days                                    | 1,411/1,431 (98.6%) | 3,678/3,753 (98.0%) | 1                |        | 1                |        |
| 180 to 545 days                               | 6/1,431 (0.4%)      | 34/3,753 (0.9%)     | 0.46 (0.19-1.10) | 0.080  | 0.69 (0.34-1.40) | 0.306  |
| > 545 days                                    | 14/1,431 (1.0%)     | 41/3,753 (1.1%)     | 0.89 (0.48-1.64) | 0.708  | 1.91 (1.04-3.52) | 0.037* |
| Underweight (n= 333)                          |                     |                     |                  |        |                  |        |
| < 180 days                                    | 168/168 (100.0%)    | 163/165 (98.8%)     | 1                |        | 1                |        |
| 180 to 545 days                               | 0/168 (0.0%)        | 1/165 (0.6%)        | N/A              |        | N/A              |        |
| > 545 days                                    | 0/168 (0.0%)        | 1/165 (0.6%)        | N/A              |        | N/A              |        |
| Normal weight (n= 3,240)                      |                     |                     |                  |        |                  |        |
| < 180 days                                    | 922/934 (98.7%)     | 2,264/2,306 (98.2%) | 1                |        | 1                |        |
| 180 to 545 days                               | 3/934 (0.3%)        | 22/2,306 (1.0%)     | 0.33 (0.10-1.12) | 0.076  | 0.51 (0.19-1.34) | 0.171  |
| > 545 days                                    | 9/934 (1.0%)        | 20/2,306 (0.9%)     | 1.10 (0.50-2.44) | 0.805  | 1.51 (0.72-3.16) | 0.279  |
| Overweight (n= 2,285)                         |                     |                     |                  |        |                  |        |
| < 180 days                                    | 552/560 (98.6%)     | 1,679/1,725 (97.3%) | 1                |        | 1                |        |
| 180 to 545 days                               | 3/560 (0.5%)        | 26/1,725 (1.5%)     | 0.35 (0.11-1.16) | 0.087  | 0.19 (0.06-0.61) | 0.006* |
| > 545 days                                    | 5/560 (0.9%)        | 20/1,725 (1.2%)     | 0.76 (0.28-2.04) | 0.586  | 1.77 (0.70-4.48) | 0.226  |
| Obese (n= 2,940)                              |                     |                     |                  |        |                  |        |
| < 180 days                                    | 632/647 (97.7%)     | 2,222/2,293 (96.9%) | 1                |        | 1                |        |
| 180 to 545 days                               | 8/647 (1.2%)        | 34/2,293 (1.5%)     | 0.83 (0.38-1.80) | 0.632  | 0.59 (0.31-1.13) | 0.113  |
| > 545 days                                    | 7/647 (1.1%)        | 37/2,293 (1.6%)     | 0.67 (0.30-1.50) | 0.326  | 0.76 (0.38-1.52) | 0.438  |
| Non-smoker (n= 4,997)                         |                     |                     |                  |        |                  |        |
| < 180 days                                    | 1,333/1,355 (98.4%) | 3,555/3,642 (97.6%) | 1                |        | 1                |        |
| 180 to 545 days                               | 9/1,355 (0.7%)      | 47/3,642 (1.3%)     | 0.51 (0.25-1.04) | 0.066  | 0.44 (0.23-0.83) | 0.012* |
| > 545 days                                    | 13/1,355 (1.0%)     | 40/3,642 (1.1%)     | 0.87 (0.46-1.63) | 0.656  | 1.16 (0.66-2.03) | 0.601  |
| Past and current smoker (n= 3,801)            |                     |                     |                  |        |                  |        |
| < 180 days                                    | 941/954 (98.6%)     | 2,773/2,847 (97.4%) | 1                |        | 1                |        |
| 180 to 545 days                               | 5/954 (0.5%)        | 36/2,847 (1.3%)     | 0.41 (0.16-1.05) | 0.062  | 0.56 (0.26-1.20) | 0.134  |
| > 545 days                                    | 8/954 (0.8%)        | 38/2,847 (1.3%)     | 0.62 (0.29-1.33) | 0.222  | 1.14 (0.55-2.33) | 0.729  |
| Alcohol consumption <1 time a week (n= 4,893) |                     |                     |                  |        |                  |        |
| < 180 days                                    | 1,484/1,508 (98.4%) | 3,308/3,385 (97.7%) | 1                |        | 1                |        |
| 180 to 545 days                               | 8/1,508 (0.5%)      | 42/3,385 (1.2%)     | 0.42 (0.20-0.91) | 0.027* | 0.52 (0.27-0.99) | 0.047* |
| > 545 days                                    | 16/1,508 (1.1%)     | 35/3,385 (1.0%)     | 1.02 (0.56-1.85) | 0.951  | 1.64 (0.90-2.98) | 0.108  |
| Alcohol consumption ≥1 time a week (n= 3,905) |                     |                     |                  |        |                  |        |
| < 180 days                                    | 790/801 (98.6%)     | 3,020/3,104 (97.3%) | 1                |        | 1                |        |
| 180 to 545 days                               | 6/801 (0.7%)        | 41/3,104 (1.3%)     | 0.56 (0.24-1.32) | 0.186  | 0.41 (0.19-0.88) | 0.022* |
| > 545 days                                    | 5/801 (0.6%)        | 43/3,104 (1.4%)     | 0.44 (0.18-1.13) | 0.087  | 0.67 (0.34-1.34) | 0.258  |

|                                              |                     |                     |                  |        |                  |        |
|----------------------------------------------|---------------------|---------------------|------------------|--------|------------------|--------|
| SBP < 140 mmHg and DBP < 90 mmHg (n= 6,300)  |                     |                     |                  |        |                  |        |
| < 180 days                                   | 1,502/1,522 (98.7%) | 4,658/4,778 (97.5%) | 1                |        | 1                |        |
| 180 to 545 days                              | 7/1,522 (0.5%)      | 60/4,778 (1.3%)     | 0.36 (0.17-0.79) | 0.011* | 0.36 (0.19-0.67) | 0.001* |
| > 545 days                                   | 13/1,522 (0.9%)     | 60/4,778 (1.3%)     | 0.67 (0.37-1.23) | 0.196  | 0.96 (0.57-1.63) | 0.882  |
| SBP ≥ 140 mmHg or DBP ≥ 90 mmHg (n= 2,498)   |                     |                     |                  |        |                  |        |
| < 180 days                                   | 772/787 (98.1%)     | 1,670/1,711 (97.6%) | 1                |        | 1                |        |
| 180 to 545 days                              | 7/787 (0.9%)        | 23/1,711 (1.3%)     | 0.66 (0.28-1.54) | 0.336  | 0.76 (0.32-1.76) | 0.516  |
| > 545 days                                   | 8/787 (1.0%)        | 18/1,711 (1.1%)     | 0.96 (0.42-2.22) | 0.927  | 1.77 (0.76-4.10) | 0.185  |
| Fasting blood glucose < 100 mg/dL (n= 5,024) |                     |                     |                  |        |                  |        |
| < 180 days                                   | 1,307/1,324 (98.7%) | 3,633/3,700 (98.2%) | 1                |        | 1                |        |
| 180 to 545 days                              | 6/1,324 (0.5%)      | 37/3,700 (1.0%)     | 0.45 (0.19-1.07) | 0.071  | 0.51 (0.24-1.09) | 0.083  |
| > 545 days                                   | 11/1,324 (0.8%)     | 30/3,700 (0.8%)     | 1.02 (0.51-2.04) | 0.957  | 1.73 (0.85-3.55) | 0.133  |
| Fasting blood glucose ≥ 100 mg/dL (n= 3,774) |                     |                     |                  |        |                  |        |
| < 180 days                                   | 967/985 (98.2%)     | 2,695/2,789 (96.6%) | 1                |        | 1                |        |
| 180 to 545 days                              | 8/985 (0.8%)        | 46/2,789 (1.6%)     | 0.48 (0.23-1.03) | 0.060  | 0.48 (0.25-0.91) | 0.026* |
| > 545 days                                   | 10/985 (1.0%)       | 48/2,789 (1.7%)     | 0.58 (0.29-1.15) | 0.120  | 0.94 (0.53-1.68) | 0.832  |
| Total cholesterol < 200 mg/dL (n= 5,231)     |                     |                     |                  |        |                  |        |
| < 180 days                                   | 1,432/1,451 (98.7%) | 3,658/3,780 (96.8%) | 1                |        | 1                |        |
| 180 to 545 days                              | 8/1,451 (0.6%)      | 56/3,780 (1.5%)     | 0.36 (0.17-0.77) | 0.008* | 0.38 (0.20-0.71) | 0.003* |
| > 545 days                                   | 11/1,451 (0.8%)     | 66/3,780 (1.7%)     | 0.43 (0.22-0.81) | 0.009* | 0.98 (0.57-1.71) | 0.949  |
| Total cholesterol ≥ 200 mg/dL (n= 3,567)     |                     |                     |                  |        |                  |        |
| < 180 days                                   | 842/858 (98.1%)     | 2,670/2,709 (98.6%) | 1                |        | 1                |        |
| 180 to 545 days                              | 6/858 (0.7%)        | 27/2,709 (1.0%)     | 0.70 (0.29-1.71) | 0.440  | 0.68 (0.29-1.55) | 0.354  |
| > 545 days                                   | 10/858 (1.2%)       | 12/2,709 (0.4%)     | 2.64 (1.14-6.14) | 0.024* | 1.38 (0.66-2.90) | 0.394  |
| CCI scores = 0 (n= 3,212)                    |                     |                     |                  |        |                  |        |
| < 180 days                                   | 245/245 (100.0%)    | 2,919/2,967 (98.4%) | 1                |        | 1                |        |
| 180 to 545 days                              | 0/245 (0.0%)        | 28/2,967 (0.9%)     | N/A              |        | N/A              |        |
| > 545 days                                   | 0/245 (0.0%)        | 20/2,967 (0.7%)     | N/A              |        | N/A              |        |
| CCI scores = 1 (n= 1,972)                    |                     |                     |                  |        |                  |        |
| < 180 days                                   | 244/248 (98.4%)     | 1,677/1,724 (97.3%) | 1                |        | 1                |        |
| 180 to 545 days                              | 1/248 (0.4%)        | 18/1,724 (1.0%)     | 0.38 (0.05-2.87) | 0.350  | 1.16 (0.25-5.34) | 0.849  |
| > 545 days                                   | 3/248 (1.2%)        | 29/1,724 (1.7%)     | 0.71 (0.21-2.35) | 0.576  | 1.18 (0.50-2.75) | 0.705  |
| CCI scores ≥ 2 (n= 3,614)                    |                     |                     |                  |        |                  |        |
| < 180 days                                   | 1785/1,816 (98.3%)  | 1,732/1,798 (96.3%) | 1                |        | 1                |        |
| 180 to 545 days                              | 13/1,816 (0.7%)     | 37/1,798 (2.1%)     | 0.34 (0.18-0.64) | 0.001* | 0.54 (0.28-1.03) | 0.062  |



|                                                 |                    |                     |                  |        |                  |         |
|-------------------------------------------------|--------------------|---------------------|------------------|--------|------------------|---------|
| > 545 days                                      | 18/1,816 (1.0%)    | 29/1,798 (1.6%)     | 0.60 (0.33-1.09) | 0.093  | 1.53 (0.80-2.94) | 0.202   |
| Non dyslipidemia history (n= 5,514)             |                    |                     |                  |        |                  |         |
| < 180 days                                      | 1798/1,808 (99.4%) | 3,687/3,706 (99.5%) | 1                |        | 1                |         |
| 180 to 545 days                                 | 5/1,808 (0.3%)     | 8/3,706 (0.2%)      | 1.28 (0.42-3.92) | 0.664  | 0.59 (0.22-1.54) | 0.279   |
| > 545 days                                      | 5/1,808 (0.3%)     | 11/3,706 (0.3%)     | 0.93 (0.32-2.69) | 0.896  | 1.09 (0.39-3.07) | 0.866   |
| Dyslipidemia history (n= 3,284)                 |                    |                     |                  |        |                  |         |
| < 180 days                                      | 476/501 (95.0%)    | 2,641/2,783 (94.9%) | 1                |        | 1                |         |
| 180 to 545 days                                 | 9/501 (1.8%)       | 75/2,783 (2.7%)     | 0.67 (0.33-1.34) | 0.255  | 0.44 (0.26-0.73) | 0.002*  |
| > 545 days                                      | 16/501 (3.2%)      | 67/2,783 (2.4%)     | 1.33 (0.76-2.31) | 0.319  | 1.24 (0.80-1.91) | 0.341   |
| Only surgery (n= 7,259)                         |                    |                     |                  |        |                  |         |
| < 180 days                                      | 1355/1,377 (98.4%) | 5,733/5,882 (97.5%) | 1                |        | 1                |         |
| 180 to 545 days                                 | 7/1,377 (0.5%)     | 78/5,882 (1.3%)     | 0.38 (0.17-0.82) | 0.014* | 0.26 (0.14-0.52) | <0.001* |
| > 545 days                                      | 15/1,377 (1.1%)    | 71/5,882 (1.2%)     | 0.89 (0.51-1.57) | 0.695  | 1.25 (0.78-2.02) | 0.360   |
| Surgery+radiotherapy or chemotherapy (n= 1,539) |                    |                     |                  |        |                  |         |
| < 180 days                                      | 919/932 (98.6%)    | 595/607 (98.0%)     | 1                |        | 1                |         |
| 180 to 545 days                                 | 7/932 (0.8%)       | 5/607 (0.8%)        | 0.91 (0.29-2.87) | 0.867  | 1.15 (0.44-3.03) | 0.775   |
| > 545 days                                      | 6/932 (0.6%)       | 7/607 (1.2%)        | 0.55 (0.19-1.66) | 0.292  | 1.03 (0.33-3.20) | 0.958   |

Abbreviations: CCI, Charlson Comorbidity Index; SBP, Systolic blood pressure; DBP, Diastolic blood pressure;

\* Significance at  $P < 0.05$

† Adjusted for age, sex, income, region of residence, SBP, DBP, fasting blood glucose, total cholesterol, obesity, smoking, alcohol consumption, dyslipidemia history, CCI scores and treatment type.

**Supplementary Table S6** Crude and overlap propensity score weighted odd ratios of dates of lipophilic statin prescription for mortality in gastric cancer participants.

| Characteristics                         | Dead participants<br>(exposure/total, %) | Survived participants<br>(exposure/total, %) | Odd ratios for mortality (95% confidence interval) |                 |                          |                 |
|-----------------------------------------|------------------------------------------|----------------------------------------------|----------------------------------------------------|-----------------|--------------------------|-----------------|
|                                         |                                          |                                              | Crude                                              | <i>P</i> -value | Overlap weighted model † | <i>P</i> -value |
| <b>Age &lt; 65 years old (n= 4,156)</b> |                                          |                                              |                                                    |                 |                          |                 |
| < 180 days                              | 697/737 (94.6%)                          | 3,119/3,419 (91.2%)                          | 1                                                  |                 | 1                        |                 |
| 180 to 545 days                         | 22/737 (3.0%)                            | 170/3,419 (5.0%)                             | 0.58 (0.37-0.91)                                   | 0.018*          | 1.12 (0.78-1.60)         | 0.546           |
| > 545 days                              | 18/737 (2.4%)                            | 130/3,419 (3.8%)                             | 0.62 (0.38-1.02)                                   | 0.061           | 1.33 (0.89-1.99)         | 0.170           |
| <b>Age ≥ 65 years old (n= 4,642)</b>    |                                          |                                              |                                                    |                 |                          |                 |
| < 180 days                              | 1,440/1,572 (91.6%)                      | 2,635/3,070 (85.8%)                          | 1                                                  |                 | 1                        |                 |
| 180 to 545 days                         | 80/1,572 (5.1%)                          | 192/3,070 (6.3%)                             | 0.76 (0.58-1.00)                                   | 0.048*          | 1.24 (0.95-1.62)         | 0.109           |
| > 545 days                              | 52/1,572 (3.3%)                          | 243/3,070 (7.9%)                             | 0.39 (0.29-0.53)                                   | <0.001*         | 0.72 (0.54-0.97)         | 0.030*          |
| <b>Male (n= 6,471)</b>                  |                                          |                                              |                                                    |                 |                          |                 |
| < 180 days                              | 1,637/1,761 (93.0%)                      | 4,226/4,710 (89.7%)                          | 1                                                  |                 | 1                        |                 |
| 180 to 545 days                         | 71/1,761 (4.0%)                          | 241/4,710 (5.1%)                             | 0.76 (0.58-1.00)                                   | 0.048*          | 1.05 (0.82-1.35)         | 0.713           |
| > 545 days                              | 53/1,761 (3.0%)                          | 243/4,710 (5.2%)                             | 0.56 (0.42-0.76)                                   | <0.001*         | 0.88 (0.67-1.15)         | 0.347           |
| <b>Female (n= 2,327)</b>                |                                          |                                              |                                                    |                 |                          |                 |
| < 180 days                              | 500/548 (91.2%)                          | 1,528/1,779 (85.9%)                          | 1                                                  |                 | 1                        |                 |
| 180 to 545 days                         | 31/548 (5.7%)                            | 121/1,779 (6.8%)                             | 0.78 (0.52-1.18)                                   | 0.239           | 1.79 (1.24-2.58)         | 0.002*          |
| > 545 days                              | 17/548 (3.1%)                            | 130/1,779 (7.3%)                             | 0.40 (0.24-0.67)                                   | 0.001*          | 0.63 (0.41-0.96)         | 0.034*          |
| <b>Low income groups (n= 3,875)</b>     |                                          |                                              |                                                    |                 |                          |                 |
| < 180 days                              | 1,058/1,150 (92.0%)                      | 2,412/2,725 (88.5%)                          | 1                                                  |                 | 1                        |                 |
| 180 to 545 days                         | 56/1,150 (4.9%)                          | 166/2,725 (6.1%)                             | 0.77 (0.56-1.05)                                   | 0.098           | 1.09 (0.81-1.47)         | 0.564           |
| > 545 days                              | 36/1,150 (3.1%)                          | 147/2,725 (5.4%)                             | 0.56 (0.39-0.81)                                   | 0.002*          | 1.18 (0.82-1.70)         | 0.368           |
| <b>High income groups (n= 4,923)</b>    |                                          |                                              |                                                    |                 |                          |                 |
| < 180 days                              | 1,079/1,159 (93.1%)                      | 3,342/3,764 (88.8%)                          | 1                                                  |                 | 1                        |                 |
| 180 to 545 days                         | 46/1,159 (4.0%)                          | 196/3,764 (5.2%)                             | 0.73 (0.52-1.01)                                   | 0.057           | 1.41 (1.06-1.89)         | 0.020*          |
| > 545 days                              | 34/1,159 (2.9%)                          | 226/3,764 (6.0%)                             | 0.47 (0.32-0.67)                                   | <0.001*         | 0.61 (0.46-0.83)         | 0.001*          |
| <b>Urban residents (n= 3,614)</b>       |                                          |                                              |                                                    |                 |                          |                 |
| < 180 days                              | 803/878 (91.5%)                          | 2,416/2,736 (88.3%)                          | 1                                                  |                 | 1                        |                 |
| 180 to 545 days                         | 42/878 (4.8%)                            | 157/2,736 (5.7%)                             | 0.80 (0.57-1.14)                                   | 0.224           | 1.23 (0.89-1.71)         | 0.213           |
| > 545 days                              | 33/878 (3.8%)                            | 163/2,736 (6.0%)                             | 0.61 (0.42-0.89)                                   | 0.011*          | 0.85 (0.61-1.17)         | 0.319           |
| <b>Rural residents (n= 5,184)</b>       |                                          |                                              |                                                    |                 |                          |                 |

|                                                         |                     |                     |                  |         |                  |        |
|---------------------------------------------------------|---------------------|---------------------|------------------|---------|------------------|--------|
| < 180 days                                              | 1,334/1,431 (93.2%) | 3,338/3,753 (88.9%) | 1                |         | 1                |        |
| 180 to 545 days                                         | 60/1,431 (4.2%)     | 205/3,753 (5.5%)    | 0.73 (0.55-0.98) | 0.038*  | 1.23 (0.94-1.61) | 0.127  |
| > 545 days                                              | 37/1,431 (2.6%)     | 210/3,753 (5.6%)    | 0.44 (0.31-0.63) | <0.001* | 0.78 (0.57-1.07) | 0.129  |
| <b>Underweight (n= 333)</b>                             |                     |                     |                  |         |                  |        |
| < 180 days                                              | 164/168 (97.6%)     | 158/165 (95.8%)     | 1                |         | 1                |        |
| 180 to 545 days                                         | 2/168 (1.2%)        | 4/165 (2.4%)        | 0.48 (0.09-2.67) | 0.403   | N/A              |        |
| > 545 days                                              | 2/168 (1.2%)        | 3/165 (1.8%)        | 0.64 (0.11-3.90) | 0.630   | 0.84 (0.09-8.19) | 0.883  |
| <b>Normal weight (n= 3,240)</b>                         |                     |                     |                  |         |                  |        |
| < 180 days                                              | 882/934 (94.4%)     | 2,125/2,306 (92.2%) | 1                |         | 1                |        |
| 180 to 545 days                                         | 32/934 (3.4%)       | 93/2,306 (4.0%)     | 0.83 (0.55-1.25) | 0.369   | 1.69 (1.15-2.50) | 0.008* |
| > 545 days                                              | 20/934 (2.1%)       | 88/2,306 (3.8%)     | 0.55 (0.33-0.90) | 0.016*  | 0.86 (0.55-1.36) | 0.527  |
| <b>Overweight (n= 2,285)</b>                            |                     |                     |                  |         |                  |        |
| < 180 days                                              | 515/560 (92.0%)     | 1,501/1,725 (87.0%) | 1                |         | 1                |        |
| 180 to 545 days                                         | 27/560 (4.8%)       | 115/1,725 (6.7%)    | 0.68 (0.44-1.05) | 0.084   | 0.78 (0.53-1.15) | 0.209  |
| > 545 days                                              | 18/560 (3.2%)       | 109/1,725 (6.3%)    | 0.48 (0.29-0.80) | 0.005*  | 0.57 (0.37-0.88) | 0.012* |
| <b>Obese (n= 2,940)</b>                                 |                     |                     |                  |         |                  |        |
| < 180 days                                              | 576/647 (89.0%)     | 1,970/2,293 (85.9%) | 1                |         | 1                |        |
| 180 to 545 days                                         | 41/647 (6.3%)       | 150/2,293 (6.5%)    | 0.93 (0.65-1.34) | 0.712   | 1.25 (0.92-1.71) | 0.158  |
| > 545 days                                              | 30/647 (4.6%)       | 173/2,293 (7.5%)    | 0.59 (0.40-0.88) | 0.010*  | 1.02 (0.73-1.42) | 0.905  |
| <b>Non-smoker (n= 4,997)</b>                            |                     |                     |                  |         |                  |        |
| < 180 days                                              | 1,252/1,355 (92.4%) | 3,204/3,642 (88.0%) | 1                |         | 1                |        |
| 180 to 545 days                                         | 64/1,355 (4.7%)     | 209/3,642 (5.7%)    | 0.78 (0.59-1.04) | 0.097   | 1.33 (1.02-1.73) | 0.037* |
| > 545 days                                              | 39/1,355 (2.9%)     | 229/3,642 (6.3%)    | 0.44 (0.31-0.62) | <0.001* | 0.70 (0.52-0.94) | 0.018* |
| <b>Past and current smoker (n= 3,801)</b>               |                     |                     |                  |         |                  |        |
| < 180 days                                              | 885/954 (92.8%)     | 2,550/2,847 (89.6%) | 1                |         | 1                |        |
| 180 to 545 days                                         | 38/954 (4.0%)       | 153/2,847 (5.4%)    | 0.72 (0.50-1.03) | 0.071   | 1.08 (0.78-1.49) | 0.659  |
| > 545 days                                              | 31/954 (3.2%)       | 144/2,847 (5.1%)    | 0.62 (0.42-0.92) | 0.018*  | 1.03 (0.72-1.47) | 0.867  |
| <b>Alcohol consumption &lt;1 time a week (n= 4,893)</b> |                     |                     |                  |         |                  |        |
| < 180 days                                              | 1,399/1,508 (92.8%) | 3,001/3,385 (88.7%) | 1                |         | 1                |        |
| 180 to 545 days                                         | 61/1,508 (4.0%)     | 197/3,385 (5.8%)    | 0.66 (0.49-0.89) | 0.006*  | 1.09 (0.83-1.43) | 0.540  |
| > 545 days                                              | 48/1,508 (3.2%)     | 187/3,385 (5.5%)    | 0.55 (0.40-0.76) | <0.001* | 0.88 (0.65-1.19) | 0.409  |
| <b>Alcohol consumption ≥1 time a week (n= 3,905)</b>    |                     |                     |                  |         |                  |        |
| < 180 days                                              | 738/801 (92.1%)     | 2,753/3,104 (88.7%) | 1                |         | 1                |        |
| 180 to 545 days                                         | 41/801 (5.1%)       | 165/3,104 (5.3%)    | 0.93 (0.65-1.32) | 0.672   | 1.54 (1.12-2.11) | 0.008* |
| > 545 days                                              | 22/801 (2.7%)       | 186/3,104 (6.0%)    | 0.44 (0.28-0.69) | <0.001* | 0.73 (0.51-1.04) | 0.082  |

|                                              |                     |                     |                  |         |                  |         |
|----------------------------------------------|---------------------|---------------------|------------------|---------|------------------|---------|
| SBP < 140 mmHg and DBP < 90 mmHg (n= 6,300)  |                     |                     |                  |         |                  |         |
| < 180 days                                   | 1,431/1,522 (94.0%) | 4,256/4,778 (89.1%) | 1                |         | 1                |         |
| 180 to 545 days                              | 52/1,522 (3.4%)     | 249/4,778 (5.2%)    | 0.62 (0.46-0.84) | 0.002*  | 1.18 (0.91-1.53) | 0.218   |
| > 545 days                                   | 39/1,522 (2.6%)     | 273/4,778 (5.7%)    | 0.42 (0.30-0.60) | <0.001* | 0.70 (0.53-0.94) | 0.017*  |
| SBP ≥ 140 mmHg or DBP ≥ 90 mmHg (n= 2,498)   |                     |                     |                  |         |                  |         |
| < 180 days                                   | 706/787 (89.7%)     | 1,498/1,711 (87.6%) | 1                |         | 1                |         |
| 180 to 545 days                              | 50/787 (6.4%)       | 113/1,711 (6.6%)    | 0.94 (0.67-1.33) | 0.720   | 1.23 (0.88-1.73) | 0.232   |
| > 545 days                                   | 31/787 (3.9%)       | 100/1,711 (5.8%)    | 0.66 (0.44-0.99) | 0.047*  | 0.99 (0.67-1.46) | 0.965   |
| Fasting blood glucose < 100 mg/dL (n= 5,024) |                     |                     |                  |         |                  |         |
| < 180 days                                   | 1,247/1,324 (94.2%) | 3,375/3,700 (91.2%) | 1                |         | 1                |         |
| 180 to 545 days                              | 49/1,324 (3.7%)     | 170/3,700 (4.6%)    | 0.78 (0.56-1.08) | 0.134   | 1.31 (0.96-1.77) | 0.086   |
| > 545 days                                   | 28/1,324 (2.1%)     | 155/3,700 (4.2%)    | 0.49 (0.33-0.73) | 0.001*  | 0.65 (0.45-0.93) | 0.019*  |
| Fasting blood glucose ≥ 100 mg/dL (n= 3,774) |                     |                     |                  |         |                  |         |
| < 180 days                                   | 890/985 (90.4%)     | 2,379/2,789 (85.3%) | 1                |         | 1                |         |
| 180 to 545 days                              | 53/985 (5.4%)       | 192/2,789 (6.9%)    | 0.74 (0.54-1.01) | 0.058   | 1.16 (0.88-1.54) | 0.299   |
| > 545 days                                   | 42/985 (4.3%)       | 218/2,789 (7.8%)    | 0.51 (0.37-0.72) | <0.001* | 0.94 (0.70-1.27) | 0.705   |
| Total cholesterol < 200 mg/dL (n= 5,231)     |                     |                     |                  |         |                  |         |
| < 180 days                                   | 1,354/1,451 (93.3%) | 3,281/3,780 (86.8%) | 1                |         | 1                |         |
| 180 to 545 days                              | 50/1,451 (3.4%)     | 205/3,780 (5.4%)    | 0.59 (0.43-0.81) | 0.001*  | 0.99 (0.75-1.31) | 0.933   |
| > 545 days                                   | 47/1,451 (3.2%)     | 294/3,780 (7.8%)    | 0.39 (0.28-0.53) | <0.001* | 0.61 (0.46-0.81) | 0.001*  |
| Total cholesterol ≥ 200 mg/dL (n= 3,567)     |                     |                     |                  |         |                  |         |
| < 180 days                                   | 783/858 (91.3%)     | 2,473/2,709 (91.3%) | 1                |         | 1                |         |
| 180 to 545 days                              | 52/858 (6.1%)       | 157/2,709 (5.8%)    | 1.05 (0.76-1.45) | 0.785   | 1.59 (1.17-2.14) | 0.003*  |
| > 545 days                                   | 23/858 (2.7%)       | 79/2,709 (2.9%)     | 0.92 (0.57-1.47) | 0.727   | 1.47 (0.98-2.21) | 0.060   |
| CCI scores = 0 (n= 3,212)                    |                     |                     |                  |         |                  |         |
| < 180 days                                   | 225/245 (91.8%)     | 2,698/2,967 (90.9%) | 1                |         | 1                |         |
| 180 to 545 days                              | 14/245 (5.7%)       | 140/2,967 (4.7%)    | 1.20 (0.68-2.11) | 0.530   | 2.17 (1.48-3.19) | <0.001* |
| > 545 days                                   | 6/245 (2.4%)        | 129/2,967 (4.3%)    | 0.56 (0.24-1.28) | 0.168   | 0.92 (0.57-1.49) | 0.744   |
| CCI scores = 1 (n= 1,972)                    |                     |                     |                  |         |                  |         |
| < 180 days                                   | 233/248 (94.0%)     | 1,506/1,724 (87.4%) | 1                |         | 1                |         |
| 180 to 545 days                              | 10/248 (4.0%)       | 95/1,724 (5.5%)     | 0.68 (0.35-1.32) | 0.257   | 1.36 (0.86-2.16) | 0.187   |
| > 545 days                                   | 5/248 (2.0%)        | 123/1,724 (7.1%)    | 0.26 (0.11-0.65) | 0.004*  | 0.51 (0.30-0.87) | 0.014*  |
| CCI scores ≥ 2 (n= 3,614)                    |                     |                     |                  |         |                  |         |
| < 180 days                                   | 1,679/1,816 (92.5%) | 1,550/1,798 (86.2%) | 1                |         | 1                |         |
| 180 to 545 days                              | 78/1,816 (4.3%)     | 127/1,798 (7.1%)    | 0.57 (0.42-0.76) | <0.001* | 1.03 (0.76-1.41) | 0.842   |

|                                                 |                     |                     |                  |         |                  |        |
|-------------------------------------------------|---------------------|---------------------|------------------|---------|------------------|--------|
| > 545 days                                      | 59/1,816 (3.2%)     | 121/1,798 (6.7%)    | 0.45 (0.33-0.62) | <0.001* | 0.94 (0.67-1.31) | 0.697  |
| Non dyslipidemia history (n= 5,514)             |                     |                     |                  |         |                  |        |
| < 180 days                                      | 1,775/1,808 (98.2%) | 3,650/3,706 (98.5%) | 1                |         | 1                |        |
| 180 to 545 days                                 | 22/1,808 (1.2%)     | 31/3,706 (0.8%)     | 1.46 (0.84-2.53) | 0.177   | 1.43 (0.86-2.37) | 0.171  |
| > 545 days                                      | 11/1,808 (0.6%)     | 25/3,706 (0.7%)     | 0.90 (0.44-1.84) | 0.783   | 0.59 (0.29-1.22) | 0.155  |
| Dyslipidemia history (n= 3,284)                 |                     |                     |                  |         |                  |        |
| < 180 days                                      | 362/501 (72.3%)     | 2,104/2,783 (75.6%) | 1                |         | 1                |        |
| 180 to 545 days                                 | 80/501 (16.0%)      | 331/2,783 (11.9%)   | 1.41 (1.07-1.84) | 0.013*  | 1.25 (1.02-1.53) | 0.032* |
| > 545 days                                      | 59/501 (11.8%)      | 348/2,783 (12.5%)   | 0.99 (0.73-1.33) | 0.923   | 0.88 (0.71-1.09) | 0.255  |
| Only surgery (n= 7,259)                         |                     |                     |                  |         |                  |        |
| < 180 days                                      | 1,268/1,377 (92.1%) | 5,201/5,882 (88.4%) | 1                |         | 1                |        |
| 180 to 545 days                                 | 64/1,377 (4.6%)     | 341/5,882 (5.8%)    | 0.77 (0.59-1.01) | 0.061   | 1.07 (0.86-1.32) | 0.565  |
| > 545 days                                      | 45/1,377 (3.3%)     | 340/5,882 (5.8%)    | 0.54 (0.40-0.75) | <0.001* | 0.86 (0.67-1.10) | 0.228  |
| Surgery+radiotherapy or chemotherapy (n= 1,539) |                     |                     |                  |         |                  |        |
| < 180 days                                      | 869/932 (93.2%)     | 553/607 (91.1%)     | 1                |         | 1                |        |
| 180 to 545 days                                 | 38/932 (4.1%)       | 21/607 (3.5%)       | 1.15 (0.67-1.98) | 0.611   | 1.98 (1.08-3.63) | 0.027* |
| > 545 days                                      | 25/932 (2.7%)       | 33/607 (5.4%)       | 0.48 (0.28-0.82) | 0.007*  | 0.73 (0.41-1.28) | 0.267  |

Abbreviations: CCI, Charlson Comorbidity Index; SBP, Systolic blood pressure; DBP, Diastolic blood pressure;

\* Significance at  $P < 0.05$

† Adjusted for age, sex, income, region of residence, SBP, DBP, fasting blood glucose, total cholesterol, obesity, smoking, alcohol consumption, dyslipidemia history, CCI scores and treatment type.

Supplementary Figure S1.

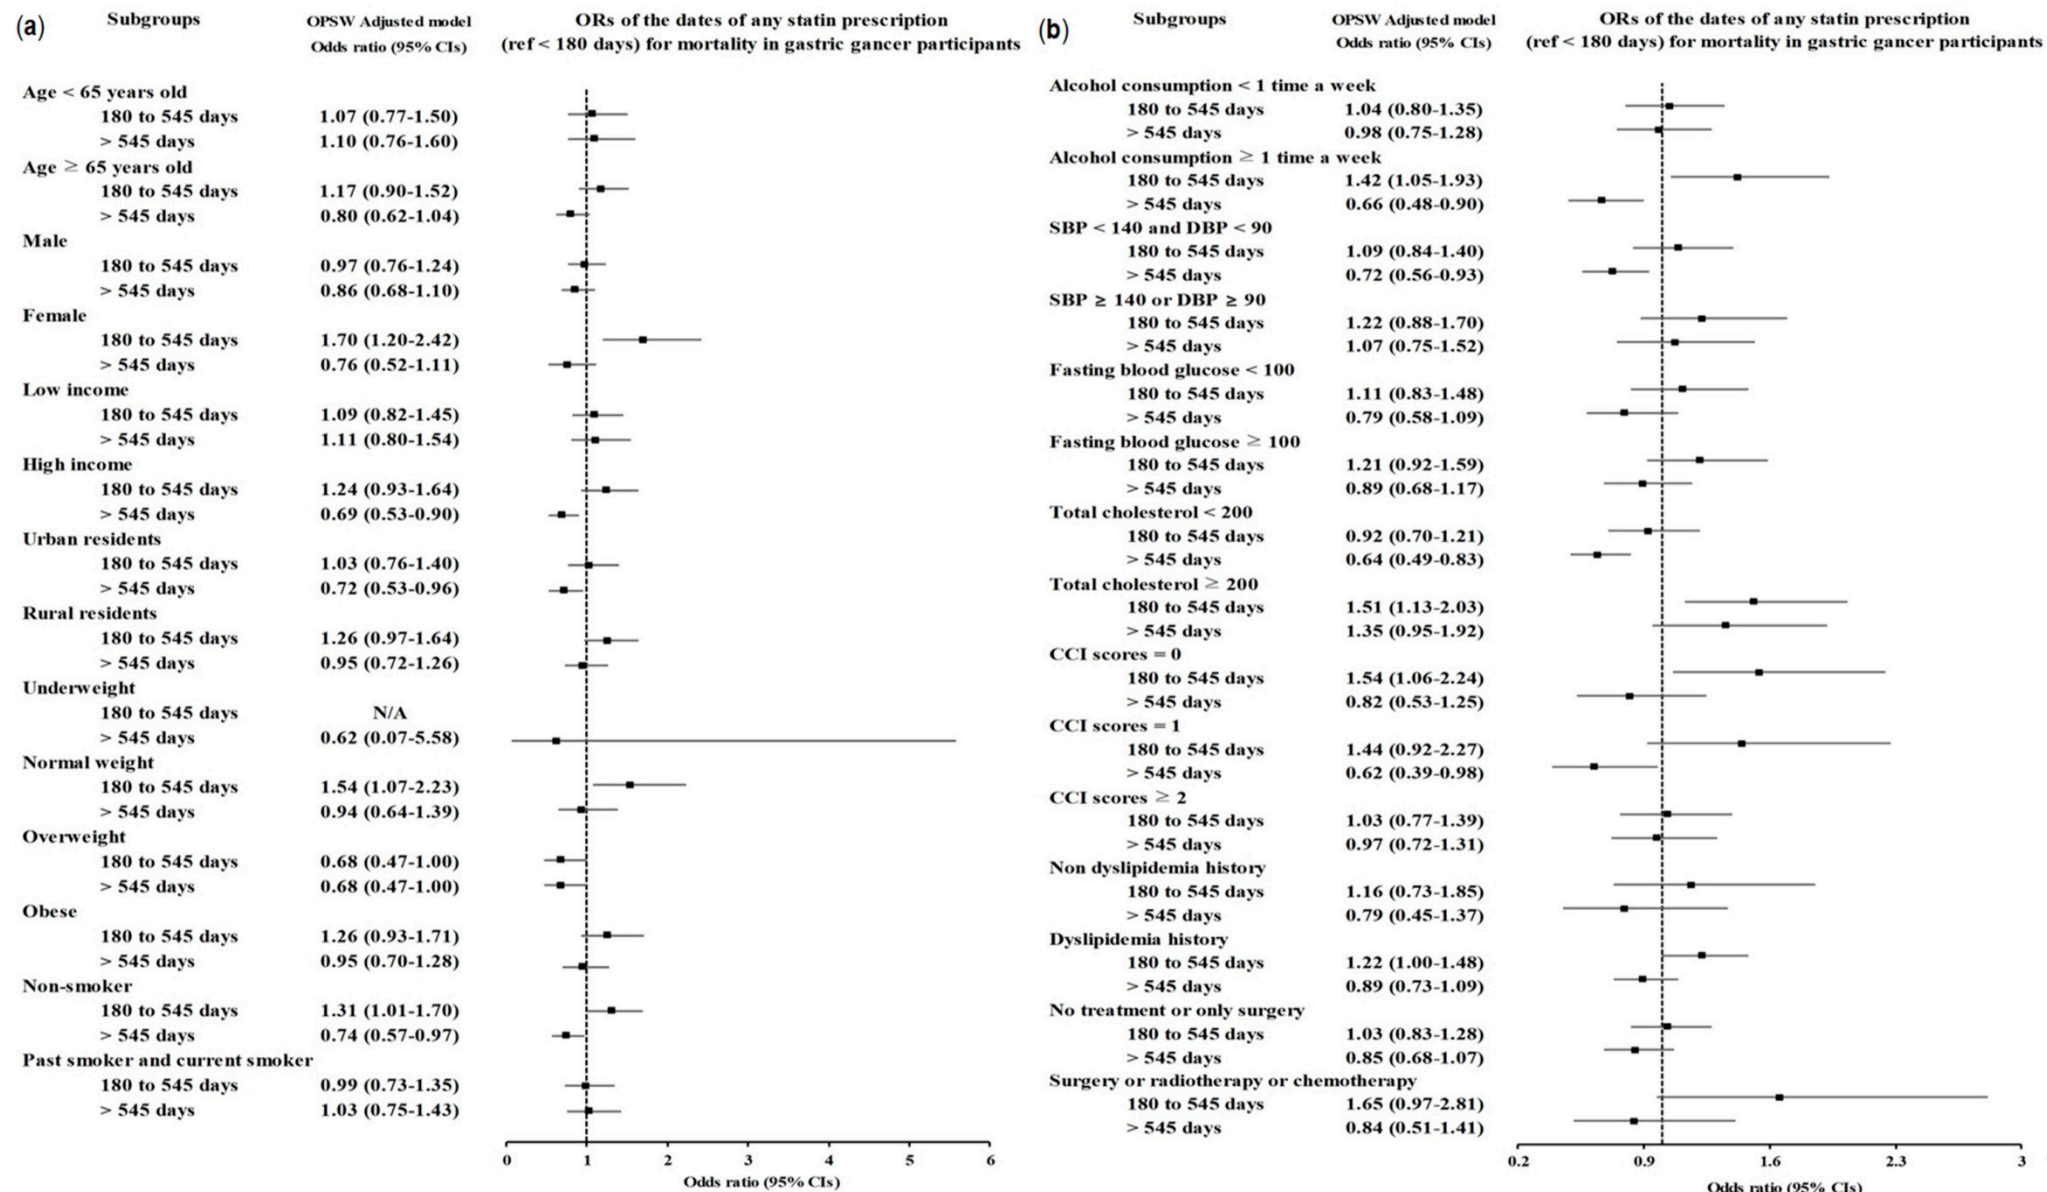

**Supplementary Figure S1.** Forest plots for multivariable conditional logistic regression depicting the overlap weighted odds ratios (95% confidence intervals) of previous use duration of any statin for overall mortality in the patients with incident gastric cancer according to comprehensive subgroup analyses including age, sex, income, region of residence, obesity, and smoking (**a**), alcohol consumption, systolic blood pressure, diastolic blood pressure, fasting blood glucose, total cholesterol, CCI scores, and dyslipidemia history (**b**). The reference period is <180 days. Full results of the crude and adjusted overall weighted models are available in Supplementary Tables S4 (any statin).

Supplementary Figure S2.

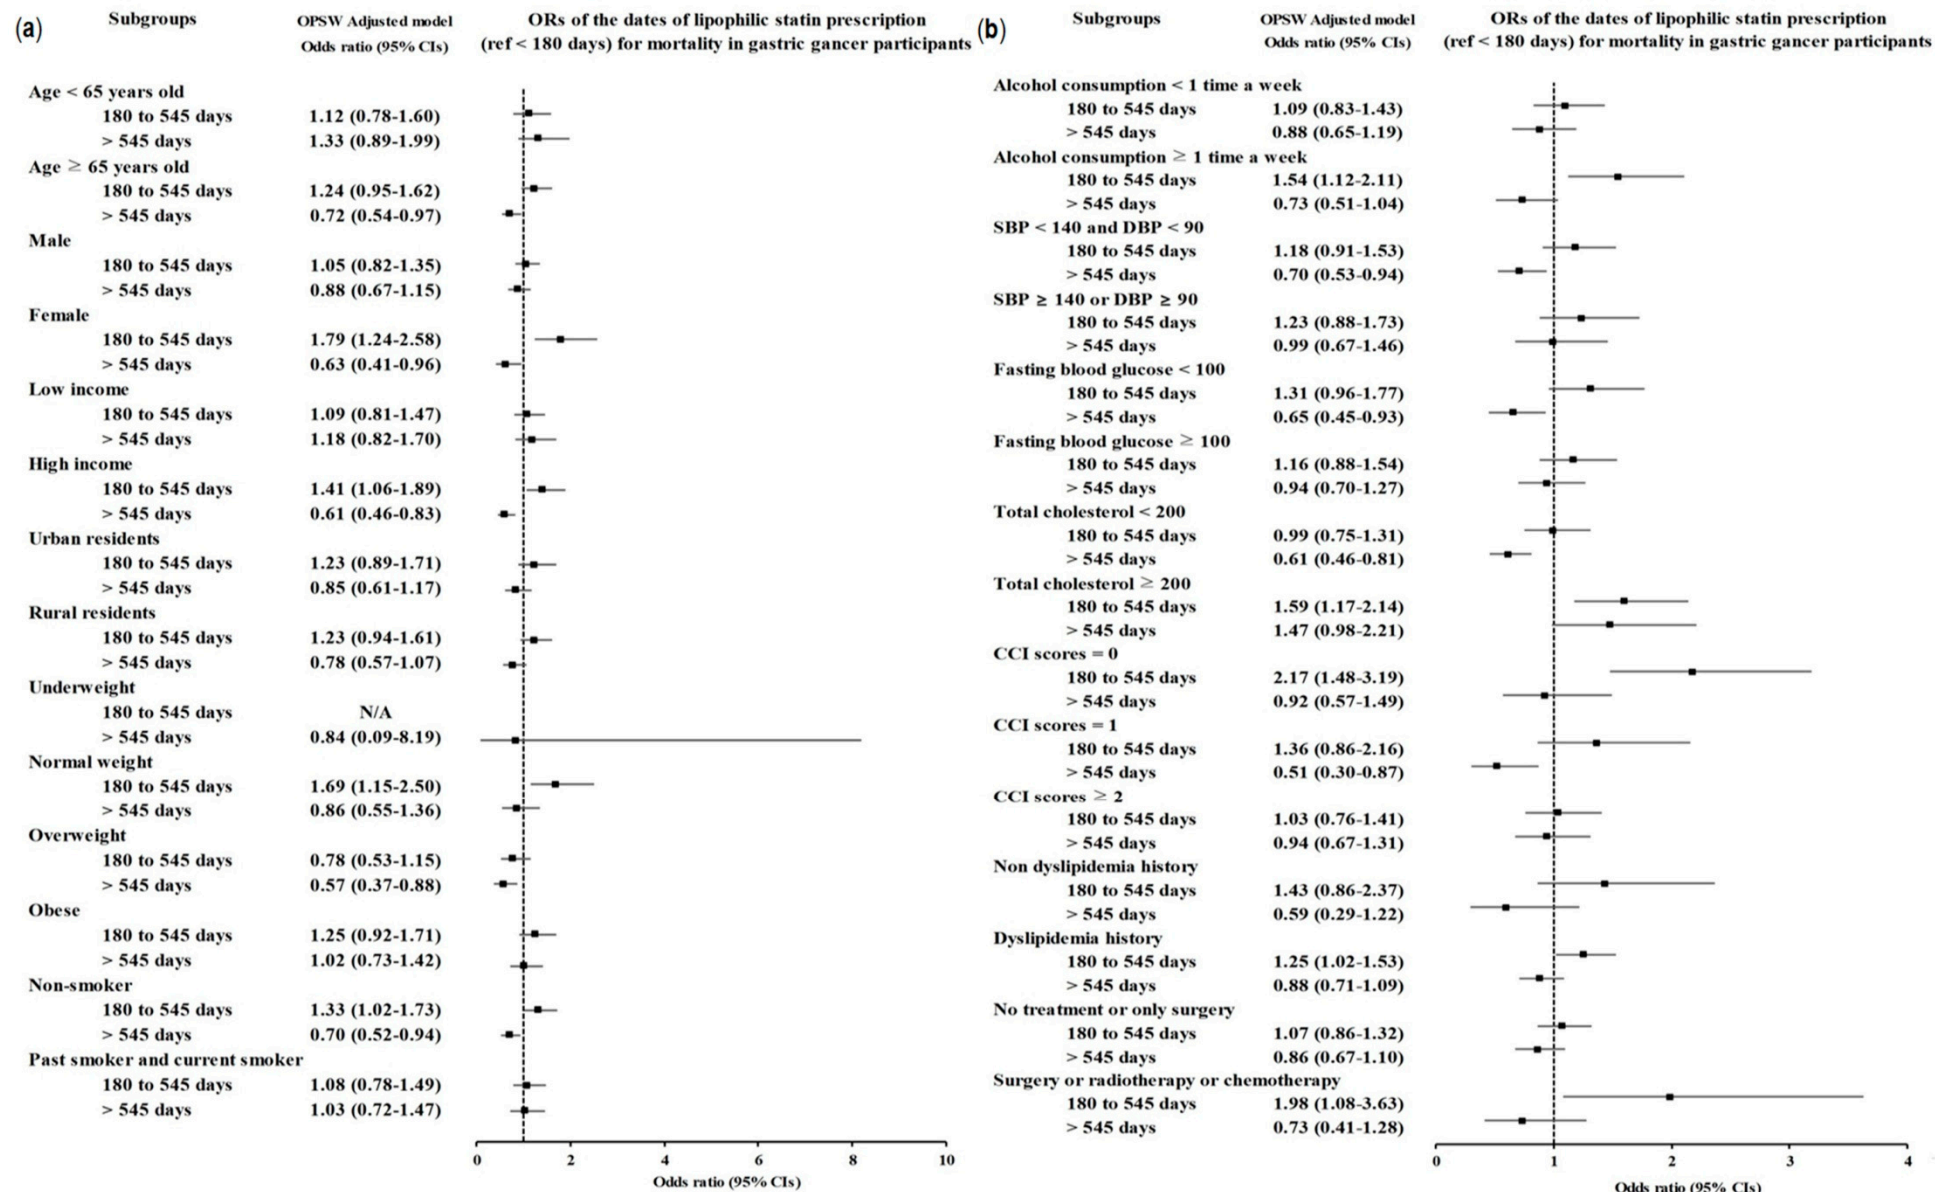



**Supplementary Figure S2.** Forest plots for multivariable conditional logistic regression depicting the overlap weighted odds ratios (95% confidence intervals) of previous use duration of lipophilic statin for overall mortality in the patients with incident gastric cancer according to comprehensive subgroup analyses including age, sex, income, region of residence, obesity, and smoking (**a**), alcohol consumption, systolic blood pressure, diastolic blood pressure, fasting blood glucose, total cholesterol, CCI scores, and dyslipidemia history (**b**). The reference period is <180 days. Full results of the crude and adjusted overall weighted models are available in Supplementary Table S6 (lipophilic statin).
